# Supplementary material for: Assessment of the National Park network of mainland Spain by the Insecurity Index of vertebrate species
Source: PubMed Central journal article supplement (PMC5962089; doi:10.1371/journal.pone.0197496), 2018-05-21
Supplement: pone.0197496.s001.pdf [file pone.0197496.s001.pdf]

## Assessment of the National Park network of mainland Spain by the Insecurity Index of vertebrate species

Alba Estrada & Raimundo Real

*Plos One*

**S1 Table. Environmental variables considered.** Variables are the average value in the 10 km x 10 km UTM cell. In the case of land use variables, the values correspond to the proportion of land covered by each land use. Sources and original resolutions are detailed under the table.

| Variable                                             | Code              | Variable                                                      | Code              |
|------------------------------------------------------|-------------------|---------------------------------------------------------------|-------------------|
| <b>Climate</b>                                       |                   | <b>Climate</b>                                                |                   |
| Mean annual temperature (°C)                         | Tann <sup>1</sup> | Days with precipitation $\geq 0.1$ mm                         | DP01              |
| Mean temperature in spring                           | TSpr              | Days with precipitation $\geq 0.1$ mm in spring               | DP01Spr           |
| Mean temperature in summer                           | TSum              | Days with precipitation $\geq 0.1$ mm in summer               | DP01Sum           |
| Mean temperature in autumn                           | TAut              | Days with precipitation $\geq 0.1$ mm in autumn               | DP01Aut           |
| Mean temperature in winter                           | TWin              | Days with precipitation $\geq 0.1$ mm in winter               | DP01Win           |
| Mean temperature in January                          | TJan              | Days with precipitation $\geq 1$ mm                           | DP1               |
| Mean temperature in July                             | TJul              | Days with precipitation $\geq 1$ mm in spring                 | DP1Spr            |
| Annual temperature range (=TJul - TJan)              | TRan              | Days with precipitation $\geq 1$ mm in summer                 | DP1Sum            |
| Minimum annual temperature                           | TnAnn             | Days with precipitation $\geq 1$ mm in autumn                 | DP1Aut            |
| Minimum temperature in spring                        | TnSpr             | Days with precipitation $\geq 1$ mm in winter                 | DP1Win            |
| Minimum temperature in summer                        | TnSum             | Days with precipitation $\geq 10$ mm                          | DP10              |
| Minimum temperature in autumn                        | TnAut             | Days with precipitation $\geq 10$ mm in spring                | DP10Spr           |
| Minimum temperature in winter                        | TnWin             | Days with precipitation $\geq 10$ mm in summer                | DP10Sum           |
| Minimum temperature in January                       | TnJan             | Days with precipitation $\geq 10$ mm in autumn                | DP10Aut           |
| Minimum temperature in July                          | TnJul             | Days with precipitation $\geq 10$ mm in winter                | DP10Win           |
| Maximum annual temperature                           | TxAnn             | Days with precipitation $\geq 30$ mm                          | DP30              |
| Maximum temperature in spring                        | TxSpr             | Days with precipitation $\geq 30$ mm in spring                | DP30Spr           |
| Maximum temperature in summer                        | TxSum             | Days with precipitation $\geq 30$ mm in summer                | DP30Sum           |
| Maximum temperature in autumn                        | TxAut             | Days with precipitation $\geq 30$ mm in autumn                | DP30Aut           |
| Maximum temperature in winter                        | TxWin             | Days with precipitation $\geq 30$ mm in winter                | DP30Win           |
| Maximum temperature in January                       | TxJan             | Mean annual runoff (mm)                                       | ROff <sup>3</sup> |
| Maximum temperature in July                          | TxJul             | Mean annual potential evapotranspiration (mm)                 | PET <sup>4</sup>  |
| Direct Irradiance at Surface (kWh/m <sup>2</sup> /d) | SID <sup>2</sup>  | Mean annual actual evapotranspiration (mm) (=min [PAnn, PET]) | AET               |
| Direct Irradiance at Surface in spring               | SIDSpr            | <b>Topography</b>                                             |                   |

|                                                    |          |                                                                              |                    |
|----------------------------------------------------|----------|------------------------------------------------------------------------------|--------------------|
| Direct Irradiance at Surface in summer             | SIDSum   | Mean altitude (m)                                                            | Alt <sup>5</sup>   |
| Direct Irradiance at Surface in autumn             | SIDAut   | Altitude difference (calculated from Alt)                                    | DAIt               |
| Direct Irradiance at Surface in winter             | SIDWin   | Slope (°) (calculated from Alt)                                              | Slop               |
| Surface Incoming Radiation (kWh/m <sup>2</sup> /d) | SIS      | Southward exposition degree                                                  | SE <sup>6</sup>    |
| Surface Incoming Radiation in spring               | SISSpr   | Westward exposition degree                                                   | WE <sup>6</sup>    |
| Surface Incoming Radiation in summer               | SISSum   | Hydrologically conditioned compound topographic index                        | CTI <sup>7</sup>   |
| Surface Incoming Radiation in autumn               | SISAut   | <b>Lithology</b>                                                             |                    |
| Surface Incoming Radiation in winter               | SISWin   | Proportion of clay                                                           | Clay <sup>8</sup>  |
| Days with minimum temperature ≤0°C                 | DTn0     | Proportion of silica                                                         | Sil                |
| Days with minimum temperature ≤0°C in spring       | DTn0Spr  | Proportion of calcareous rock                                                | Calc               |
| Days with minimum temperature ≤0°C in summer       | DTn0Sum  | Proportion of gravels                                                        | Grav               |
| Days with minimum temperature ≤0°C in autumn       | DTn0Aut  | Proportion of gypsum                                                         | Gyps               |
| Days with minimum temperature ≤0°C in winter       | DTn0Win  | <b>Human activity</b>                                                        |                    |
| Days with minimum temperature ≥20°C                | DTn20    | Distance to the nearest highway (km)                                         | DHi <sup>9</sup>   |
| Days with minimum temperature ≥20°C in autumn      | DTn20Aut | Distance to the nearest urban centre with more than 100,000 inhabitants (km) | U100               |
| Days with maximum temperature ≥25°C                | DTx25    | Distance to the nearest urban centre with more than 500,000 inhabitants (km) | U500               |
| Days with maximum temperature ≥25°C in spring      | DTx25Spr | Human population density (number of inhabitants/km <sup>2</sup> )            | HPd <sup>10</sup>  |
| Days with maximum temperature ≥25°C in summer      | DTx25Sum | <b>Land use</b>                                                              |                    |
| Days with maximum temperature ≥25°C in autumn      | DTx25Aut | Proportion of non-irrigated arable land                                      | NIAL <sup>11</sup> |
| Total annual precipitation (mm)                    | PAnn     | Proportion of pastures                                                       | Past               |
| Total precipitation in spring                      | PSpr     | Proportion of broad-leaved forest                                            | BLF                |
| Total precipitation in summer                      | PSum     | Proportion of coniferous forest                                              | CF                 |
| Total precipitation in autumn                      | PAut     | Proportion of mixed forest                                                   | MF                 |
| Total precipitation in winter                      | PWin     | Proportion of shrublands                                                     | Shrub              |

Sources and original resolutions:

<sup>1</sup> from *Tann* to *TxJul* and from *DTn0* to *DP30Win*: Agencia Estatal de Meteorología [1]. Original resolution: 1 km<sup>2</sup>

<sup>2</sup> from *SID* to *SISWin*: Sancho et al. [2]. Original resolution: 3x3 km<sup>2</sup>

<sup>3</sup> IGME [3]. Original resolution: ~1 km<sup>2</sup>

<sup>4</sup> from *PET* to *AET*: Font [4]. Original resolution: ~1 km<sup>2</sup>

<sup>5</sup> US Geological Survey [5]. Original resolution: ~1 km<sup>2</sup>

<sup>6</sup> Farr and Kobrick [6]. Original resolution: ~100x100 m<sup>2</sup>

<sup>7</sup> <http://hydrosheds.cr.usgs.gov>. Original resolution: ~600x600 m<sup>2</sup>

<sup>8</sup> from *Clay* to *Gyps*: OneGeology-Europe [7]. Original resolution: ~100x100 m<sup>2</sup>

<sup>9</sup> from *DHi* to *U500*: IGN [8]. Original resolution: ~1 km<sup>2</sup>

<sup>10</sup> ORNL [9]. Original resolution: ~1 km<sup>2</sup>

<sup>11</sup> from *NIAL* to *Shrub*: CLC [10]. Original data in vector format.

## References

1. Agencia Estatal de Meteorología. Iberian climate atlas. Air temperature and precipitation (1971-2000): Agencia Estatal de Meteorología. Ministerio de Medio Ambiente y Medio Rural y Marino; 2011.
2. Sancho JM, Riesco J, Jiménez C, Sánchez de Cos MC, Montero J, López M. Atlas de radiación solar en España utilizando datos del SAF de clima de EUMETSAT: Agencia Estatal de Meteorología. Ministerio de Agricultura, Alimentación y Medio Ambiente; 2012.
3. IGME. Mapa hidrogeológico nacional. Explicación de los mapas de lluvia útil, de reconocimiento hidrogeológico y de síntesis de los sistemas acuíferos. Vol. 81, 2ª ed. Madrid: Instituto Geológico y Minero de España. Ministerio de Industria y Energía; 1979.
4. Font I. Climatología de España y Portugal: Ediciones Universidad de Salamanca; 2000.
5. US Geological Survey. GTOPO30. Land Processes Distributed Active Archive Center. <<http://www.edcdaac.usgs.gov/gtopo30/gtopo30.asp>>. 1996.
6. Farr TG, Kobrick M. Shuttle radar topography mission produces a wealth of data. *Eos Trans Am Geophys Union*. 2000; 81: 583–585.
7. OneGeology-Europe. <http://www.onegeology-europe.org/>. 2015.
8. IGN. Mapa de carreteras. Península Ibérica, Baleares y Canarias. Madrid: Instituto Geográfico Nacional, Ministerio de Fomento; 1999.
9. ORNL. LandScan 2000 Global Population Database. Oak Ridge, TN: Oak Ridge National Laboratory (ORNL); 2001.
10. CLC. CORINE Land Cover 2000. Downloaded from <http://centrodedescargas.cnig.es/CentroDescargas/index.jsp>; 2000.
