# Supplementary material for: Assessment of the National Park network of mainland Spain by the Insecurity Index of vertebrate species
Source: PubMed Central journal article supplement (PMC5962089; doi:10.1371/journal.pone.0197496), 2018-05-21
Supplement: pone.0197496.s002.pdf [file pone.0197496.s002.pdf]

## Assessment of the National Park network of mainland Spain by the Insecurity Index of vertebrate species

Alba Estrada & Raimundo Real

*Plos One*

**S2 Table. Representativeness of observed species occurrence in the National Park network.**

| Species                          | Representativeness |
|----------------------------------|--------------------|
| <i>Chioglossa lusitanica</i>     | 0.900              |
| <i>Euproctus asper</i>           | 4.198              |
| <i>Pleurodeles waltl</i>         | 1.499              |
| <i>Bufo calamita</i>             | 0.900              |
| <i>Hyla meridionalis</i>         | 1.349              |
| <i>Rana iberica</i>              | 1.349              |
| <i>Rana pyrenaica</i>            | 17.691             |
| <i>Emys orbicularis</i>          | 2.249              |
| <i>Mauremys leprosa</i>          | 1.349              |
| <i>Testudo graeca</i>            | 18.291             |
| <i>Anguis fragilis</i>           | 1.649              |
| <i>Podarcis muralis</i>          | 3.598              |
| <i>Elaphe scalaris</i>           | 1.049              |
| <i>Phalacrocorax aristotelis</i> | 3.448              |
| <i>Ciconia nigra</i>             | 1.799              |
| <i>Netta rufina</i>              | 5.097              |
| <i>Gypaetus barbatus</i>         | 3.748              |
| <i>Neophron percnopterus</i>     | 1.349              |
| <i>Aegypus monachus</i>          | 8.546              |
| <i>Aquila adalberti</i>          | 10.795             |
| <i>Aquila chrysaetos</i>         | 2.399              |
| <i>Lagopus mutus</i>             | 10.795             |
| <i>Tetrao urogallus</i>          | 5.847              |
| <i>Perdix perdix</i>             | 6.447              |
| <i>Otis tarda</i>                | 0.150              |
| <i>Picus viridis</i>             | 0.900              |
| <i>Pyrrhocorax graculus</i>      | 7.046              |
| <i>Pyrrhocorax pyrrhocorax</i>   | 1.949              |
| <i>Galemys pyrenaicus</i>        | 3.148              |
| <i>Canis lupus</i>               | 1.049              |
| <i>Lutra lutra</i>               | 1.199              |
| <i>Ursus arctos</i>              | 3.748              |
| <i>Felis silvestris</i>          | 2.249              |
| <i>Lynx pardinus</i>             | 16.942             |
| <i>Cervus elaphus</i>            | 1.949              |
| <i>Rupicapra pyrenaica</i>       | 7.946              |
| <i>Capra pyrenaica</i>           | 2.849              |
