# Supplementary material for: Assessment of the National Park network of mainland Spain by the Insecurity Index of vertebrate species
Source: PubMed Central journal article supplement (PMC5962089; doi:10.1371/journal.pone.0197496), 2018-05-21
Supplement: pone.0197496.s007.pdf [file pone.0197496.s007.pdf]

## Assessment of the National Park network of mainland Spain by the Insecurity Index of vertebrate species

Alba Estrada & Raimundo Real

*Plos One*

**S1 Appendix. Variables included at each step of the modelling process and final favourability models.** Variables included at each step of the modelling process (i.e., pairwise correlations, spatial descriptor, FDR, and forward-backward stepwise) for each species. X: longitude; Y: latitude. Variables selected for the spatial descriptor were those selected in the trend surface approach (spatial model). The variables included in the forward-backward stepwise are those of the final favourability models. Variables are sorted according to their order of entrance in the models.  $\beta$ : coefficients; SE: standard errors; Sig: significance: \*\*\*<0.001, \*\*<0.01, \*<0.05, ns>0.05. Evaluation metrics of the models are also shown. Variable codes as in S1 Table. "Spatial" in final favourability models is the linear combination of selected spatial variables with their coefficients and the intercept of the spatial model (see Estrada et al. 2016 Plos One).

## ***Chioglossa lusitanica***

### **Pairwise correlations, spatial descriptor and FDR**

Human, lithology and land use variables were not correlated, thus all of them were selected in pairwise correlations.

#### **Variables selected**

| <b>Climate</b> | <b>Topography</b> | <b>Spatial</b>   | <b>Variables excluded by the FDR</b> |
|----------------|-------------------|------------------|--------------------------------------|
| DP1Win         | Alt               | XY               | HPd                                  |
| DP30Spr        | SE                | X <sup>2</sup>   | DTn0Sum                              |
| DP30Sum        | WE                | X <sup>2</sup> Y | Shrub                                |
| DTn0Win        | CTI               | XY <sup>2</sup>  |                                      |
| DTn0Sum        |                   |                  |                                      |
| DTn20          |                   |                  |                                      |
| DTx25Spr       |                   |                  |                                      |
| TRan           |                   |                  |                                      |
| SIDAut         |                   |                  |                                      |
| AET            |                   |                  |                                      |

### **Final favourability model**

| <b>Variables</b> | <b>β</b>  | <b>SE</b> | <b>Sig</b> | <b>Evaluation metrics</b> |               |
|------------------|-----------|-----------|------------|---------------------------|---------------|
| (Intercept)      | 14.104053 | 4.332457  | **         | AUC                       | 0.9853935     |
| Spatial          | 0.75198   | 0.196765  | ***        | Kappa                     | 0.4657085     |
| Sil              | 4.340705  | 0.923729  | ***        | Sensitivity               | 0.9880952     |
| DP30Spr          | 0.236318  | 0.135775  | ns         | Specificity               | 0.9334630     |
| DTn0Win          | -0.042055 | 0.010895  | ***        | CCR                       | 0.935192      |
| CTI              | -0.906338 | 0.251222  | ***        | HL                        | 11.3658311 ns |
| DHi              | -0.015947 | 0.007593  | *          |                           |               |
| DTn20            | -0.435574 | 0.193528  | *          |                           |               |
| Clay             | 3.87317   | 1.439383  | **         |                           |               |
| Calc             | 2.86569   | 1.209104  | *          |                           |               |
| BLF              | -1.552821 | 0.887971  | ns         |                           |               |
| Grav             | 4.034756  | 2.281961  | ns         |                           |               |
| SE               | -0.016587 | 0.010997  | ns         |                           |               |

## ***Euproctus asper***

### **Pairwise correlations, spatial descriptor and FDR**

Human, lithology and land use variables were not correlated, thus all of them were selected in pairwise correlations.

#### **Variables selected**

| <b>Climate</b> | <b>Topography</b> | <b>Spatial</b>   | <b>Variables excluded by the FDR</b> |
|----------------|-------------------|------------------|--------------------------------------|
| DP10Spr        | Alt               | X                | Shrub                                |
| DP10Sum        | SE                | XY               | WE                                   |
| DTn0Win        | WE                | X <sup>2</sup>   | Gyps                                 |
| DTn0Sum        | CTI               | X <sup>2</sup> Y |                                      |
| DTn20          |                   | XY <sup>2</sup>  |                                      |
| TRan           |                   |                  |                                      |
| AET            |                   |                  |                                      |

### **Final favourability model**

| <b>Variables</b> | <b>β</b>  | <b>SE</b> | <b>Sig</b> | <b>Evaluation metrics</b> |               |
|------------------|-----------|-----------|------------|---------------------------|---------------|
| (Intercept)      | -2.965059 | 2.667609  | ns         | AUC                       | 0.9960155     |
| Spatial          | 1.481486  | 0.222381  | ***        | Kappa                     | 0.7169263     |
| BLF              | 3.721701  | 0.98703   | ***        | Sensitivity               | 1             |
| HPd              | -0.024717 | 0.014962  | ns         | Specificity               | 0.9726509     |
| DTn20            | -0.189029 | 0.045073  | ***        | CCR                       | 0.9736247     |
| U500             | -0.018825 | 0.007658  | *          | HL                        | 22.6335351 ** |
| NIAL             | -7.78196  | 2.232869  | ***        |                           |               |
| Past             | -7.26826  | 2.898036  | *          |                           |               |
| MF               | 2.914323  | 1.988447  | ns         |                           |               |
| Alt              | 0.003819  | 0.001015  | ***        |                           |               |
| DTn0Win          | -0.105248 | 0.028221  | ***        |                           |               |
| TRan             | 0.542185  | 0.189932  | **         |                           |               |
| DTn0Sum          | -0.625408 | 0.407322  | ns         |                           |               |

## ***Pleurodeles waltl***

### **Pairwise correlations, spatial descriptor and FDR**

Human, lithology and land use variables were not correlated, thus all of them were selected in pairwise correlations.

#### **Variables selected**

| <b>Climate</b> | <b>Topography</b> | <b>Spatial</b>   | <b>Variables excluded by the FDR</b> |
|----------------|-------------------|------------------|--------------------------------------|
| DP10Spr        | Alt               | Y                | Shrub                                |
| DTn0Sum        | DAlt              | X                | HPd                                  |
| DTn20          | SE                | XY               | SE                                   |
| TRan           | WE                | X <sup>2</sup>   | BLF                                  |
| TxAut          | CTI               | X <sup>3</sup>   | Clay                                 |
| SIDSum         |                   | Y <sup>2</sup>   |                                      |
| SISWin         |                   | Y <sup>3</sup>   |                                      |
| AET            |                   | X <sup>2</sup> Y |                                      |
|                |                   | XY <sup>2</sup>  |                                      |

### **Final favourability model**

| <b>Variables</b> | <b>β</b>  | <b>SE</b> | <b>Sig</b> | <b>Evaluation metrics</b> |                |
|------------------|-----------|-----------|------------|---------------------------|----------------|
| (Intercept)      | 3.97E+00  | 1.45E+00  | **         | AUC                       | 0.8575984      |
| Spatial          | 1.06E+00  | 6.04E-02  | ***        | Kappa                     | 0.4343372      |
| DTn0Sum          | -4.15E+00 | 6.50E-01  | ***        | Sensitivity               | 0.8536386      |
| Alt              | 6.67E-04  | 1.59E-04  | ***        | Specificity               | 0.7072215      |
| U500             | 2.44E-03  | 7.90E-04  | **         | CCR                       | 0.7409570      |
| Gyps             | -1.52E+01 | 1.13E+01  | ns         | HL                        | 50.1243829 *** |
| CTI              | -1.59E-01 | 6.07E-02  | **         |                           |                |
| Grav             | 6.01E-01  | 2.33E-01  | **         |                           |                |
| DP10Spr          | -1.39E-01 | 4.20E-02  | ***        |                           |                |
| AET              | 8.82E-04  | 4.52E-04  | ns         |                           |                |
| Sil              | 2.73E-01  | 1.31E-01  | *          |                           |                |
| SIDSum           | -2.94E-01 | 1.53E-01  | ns         |                           |                |

## ***Bufo calamita***

### **Pairwise correlations, spatial descriptor and FDR**

Human, lithology and land use variables were not correlated, thus all of them were selected in pairwise correlations.

#### **Variables selected**

| <b>Climate</b> | <b>Topography</b> | <b>Spatial</b>  | <b>Variables excluded by the FDR</b> |
|----------------|-------------------|-----------------|--------------------------------------|
| DP1            | Alt               | Y               | DTx25Spr                             |
| DP30Aut        | Slop              | X               | WE                                   |
| DP30Sum        | SE                | XY              | Shrub                                |
| DTn0Sum        | WE                | X <sup>2</sup>  | DHi                                  |
| DTn20          |                   | X <sup>3</sup>  | Calc                                 |
| DTx25Spr       |                   | Y <sup>2</sup>  | Gyps                                 |
| TRan           |                   | Y <sup>3</sup>  | Alt                                  |
| TnJul          |                   | XY <sup>2</sup> |                                      |
| AET            |                   |                 |                                      |

#### **Final favourability model**

| <b>Variables</b> | <b>B</b>  | <b>SE</b> | <b>Sig</b> | <b>Evaluation metrics</b> |                |
|------------------|-----------|-----------|------------|---------------------------|----------------|
| (Intercept)      | 1.12E+00  | 4.17E-01  | **         | AUC                       | 0.6886401      |
| Spatial          | 7.69E-01  | 7.40E-02  | ***        | Kappa                     | 0.2716559      |
| U100             | -4.69E-03 | 1.13E-03  | ***        | Sensitivity               | 0.6611627      |
| Past             | -5.61E+00 | 9.39E-01  | ***        | Specificity               | 0.6109954      |
| HPd              | 8.78E-04  | 2.05E-04  | ***        | CCR                       | 0.6384702      |
| CF               | 1.10E+00  | 2.44E-01  | ***        | HL                        | 40.4083661 *** |
| BLF              | 7.82E-01  | 2.79E-01  | **         |                           |                |
| DP30Aut          | -3.18E-01 | 4.30E-02  | ***        |                           |                |
| Sil              | 5.15E-01  | 8.99E-02  | ***        |                           |                |
| U500             | -3.52E-03 | 6.07E-04  | ***        |                           |                |
| TRan             | -5.64E-02 | 1.81E-02  | **         |                           |                |
| AET              | 7.33E-04  | 2.90E-04  | *          |                           |                |
| SE               | 0.0034787 | 0.0022651 | ns         |                           |                |

## *Hyla meridionalis*

### Pairwise correlations, spatial descriptor and FDR

Human, lithology and land use variables were not correlated, thus all of them were selected in pairwise correlations.

#### Variables selected

| Climate | Topography | Spatial          | Variables excluded by the FDR |
|---------|------------|------------------|-------------------------------|
| DP30Win | Alt        | Y                | CF                            |
| DP30Sum | DAlt       | XY               | Gyps                          |
| DTn0Sum | SE         | X <sup>3</sup>   | TRan                          |
| DTn20   | WE         | Y <sup>2</sup>   | Shrub                         |
| TAut    | CTI        | Y <sup>3</sup>   | DHi                           |
| TRan    |            | X <sup>2</sup> Y |                               |
| ROff    |            | XY <sup>2</sup>  |                               |
| AET     |            |                  |                               |

### Final favourability model

| Variables   | $\beta$    | SE        | Sig | Evaluation metrics |                |
|-------------|------------|-----------|-----|--------------------|----------------|
| (Intercept) | 1.91E+00   | 1.99E+00  | ns  | AUC                | 0.9494523      |
| Spatial     | 8.52E-01   | 4.14E-02  | *** | Kappa              | 0.5852454      |
| AET         | 2.52E-03   | 5.07E-04  | *** | Sensitivity        | 0.9322251      |
| DTn20       | 1.85E-02   | 4.88E-03  | *** | Specificity        | 0.8486522      |
| Sil         | -1.16E+00  | 4.46E-01  | **  | CCR                | 0.8609646      |
| SE          | 1.59E-02   | 4.68E-03  | *** | HL                 | 56.7003716 *** |
| Alt         | -1.09E-03  | 2.80E-04  | *** |                    |                |
| CTI         | -2.40E-01  | 8.81E-02  | **  |                    |                |
| HPd         | 3.84E-04   | 1.35E-04  | **  |                    |                |
| Past        | 5.48E+00   | 2.15E+00  | *   |                    |                |
| Clay        | -2.06E+00  | 4.67E-01  | *** |                    |                |
| WE          | 8.26E-03   | 5.75E-03  | ns  |                    |                |
| BLF         | 1.2950793  | 0.6347605 | *   |                    |                |
| Grav        | -1.9231928 | 0.5357702 | *** |                    |                |
| Calc        | -1.7108759 | 0.4807249 | *** |                    |                |

## ***Rana iberica***

### **Pairwise correlations, spatial descriptor and FDR**

Human, lithology and land use variables were not correlated, thus all of them were selected in pairwise correlations.

#### **Variables selected**

| <b>Climate</b> | <b>Topography</b> | <b>Spatial</b>   | <b>Variables excluded by the FDR</b> |
|----------------|-------------------|------------------|--------------------------------------|
| DP10Win        | Alt               | Y                | Alt                                  |
| DP30Spr        | DAlt              | X                | SE                                   |
| DP30Sum        | SE                | XY               | HPd                                  |
| DTn0Sum        | WE                | X <sup>2</sup>   |                                      |
| DTn20          | CTI               | X <sup>3</sup>   |                                      |
| TRan           |                   | Y <sup>2</sup>   |                                      |
| SISWin         |                   | Y <sup>3</sup>   |                                      |
| PET            |                   | X <sup>2</sup> Y |                                      |
| AET            |                   | XY <sup>2</sup>  |                                      |

#### **Final favourability model**

| <b>Variables</b> | <b>β</b>   | <b>SE</b> | <b>Sig</b> | <b>Evaluation metrics</b> |               |
|------------------|------------|-----------|------------|---------------------------|---------------|
| (Intercept)      | -6.66E+00  | 1.80E+00  | ***        | AUC                       | 0.9834648     |
| Spatial          | 1.04E+00   | 1.08E-01  | ***        | Kappa                     | 0.6569974     |
| DAlt             | 1.20E-03   | 3.16E-04  | ***        | Sensitivity               | 0.9522822     |
| Sil              | 5.92E+00   | 8.51E-01  | ***        | Specificity               | 0.9218815     |
| U500             | -9.78E-03  | 1.72E-03  | ***        | CCR                       | 0.9246420     |
| CF               | 4.13E+00   | 8.44E-01  | ***        | HL                        | 20.9191192 ** |
| PET              | -1.75E-02  | 2.99E-03  | ***        |                           |               |
| AET              | 1.08E-02   | 2.29E-03  | ***        |                           |               |
| DP30Sum          | -1.33E+00  | 3.23E-01  | ***        |                           |               |
| Calc             | 5.80E+00   | 9.66E-01  | ***        |                           |               |
| Grav             | 6.10E+00   | 1.19E+00  | ***        |                           |               |
| DP10Win          | 1.09E-01   | 3.31E-02  | **         |                           |               |
| Clay             | 3.7404198  | 1.0882839 | ***        |                           |               |
| SISWin           | 4.8799604  | 0.983512  | ***        |                           |               |
| TRan             | -0.2966148 | 0.0723339 | ***        |                           |               |
| DTn0Sum          | 0.5978934  | 0.259484  | *          |                           |               |
| MF               | 2.5633932  | 0.8419069 | **         |                           |               |
| BLF              | 2.1377256  | 0.7343627 | **         |                           |               |
| Shrub            | 1.2962815  | 0.5504615 | *          |                           |               |

## ***Rana pyrenaica***

### **Pairwise correlations, spatial descriptor and FDR**

Human, lithology and land use variables were not correlated, thus all of them were selected in pairwise correlations.

#### **Variables selected**

| <b>Climate</b> | <b>Topography</b> | <b>Spatial</b>   | <b>Variables excluded by the FDR</b> |
|----------------|-------------------|------------------|--------------------------------------|
| DP10Spr        | Alt               | X                | WE                                   |
| DP10Sum        | SE                | XY               | Gyps                                 |
| DTn0Sum        | WE                | X <sup>3</sup>   | BLF                                  |
| DTn20          | CTI               | Y <sup>2</sup>   | Past                                 |
| TRan           |                   | Y <sup>3</sup>   | Sil                                  |
| TxAut          |                   | X <sup>2</sup> Y | U500                                 |
| AET            |                   | XY <sup>2</sup>  |                                      |

#### **Final favourability model**

| <b>Variables</b> | <b>β</b>  | <b>SE</b> | <b>Sig</b> | <b>Evaluation metrics</b> |              |
|------------------|-----------|-----------|------------|---------------------------|--------------|
| (Intercept)      | 3.31E+02  | 1.09E+02  | **         | AUC                       | 1            |
| Spatial          | 4.05E+01  | 1.29E+01  | **         | Kappa                     | 0.9051913    |
| Calc             | 1.23E+02  | 3.98E+01  | **         | Sensitivity               | 1            |
| CF               | 4.07E+02  | 1.31E+02  | **         | Specificity               | 0.9990537    |
| Shrub            | -2.49E+02 | 8.74E+01  | **         | CCR                       | 0.9990580    |
| Clay             | 3.68E+02  | 1.19E+02  | **         | HL                        | 0.9031554 ns |
| DHi              | -1.78E+00 | 6.93E-01  | *          |                           |              |
| TRan             | -2.24E+01 | 7.59E+00  | **         |                           |              |
| MF               | 4.22E+01  | 1.84E+01  | *          |                           |              |



## ***Emys orbicularis***

### **Pairwise correlations, spatial descriptor and FDR**

Human, lithology and land use variables were not correlated, thus all of them were selected in pairwise correlations.

#### **Variables selected**

| <b>Climate</b> | <b>Topography</b> | <b>Spatial</b>   | <b>Variables excluded by the FDR</b> |
|----------------|-------------------|------------------|--------------------------------------|
| DP10Sum        | Alt               | Y                | Grav                                 |
| DP30Spr        | DAlt              | X                | Gyps                                 |
| DTn0Sum        | SE                | XY               | U100                                 |
| DTn20          | WE                | X <sup>3</sup>   | WE                                   |
| TRan           | CTI               | Y <sup>2</sup>   |                                      |
| TxAut          |                   | Y <sup>3</sup>   |                                      |
| ROff           |                   | X <sup>2</sup> Y |                                      |
| AET            |                   | XY <sup>2</sup>  |                                      |

### **Final favourability model**

| <b>Variables</b> | <b>β</b>   | <b>SE</b> | <b>Sig</b> | <b>Evaluation metrics</b> |               |
|------------------|------------|-----------|------------|---------------------------|---------------|
| (Intercept)      | -3.98E-01  | 2.08E+00  | ns         | AUC                       | 0.8112590     |
| Spatial          | 5.16E-01   | 7.71E-02  | ***        | Kappa                     | 0.2116908     |
| NIAL             | -6.23E-01  | 3.10E-01  | *          | Sensitivity               | 0.7651007     |
| DTn0Sum          | -1.75E+00  | 6.98E-01  | *          | Specificity               | 0.7183707     |
| Calc             | -8.82E-01  | 2.20E-01  | ***        | CCR                       | 0.7223060     |
| DHi              | 1.49E-02   | 2.70E-03  | ***        | HL                        | 20.8598058 ** |
| U500             | -4.85E-03  | 1.07E-03  | ***        |                           |               |
| BLF              | 2.61E+00   | 4.85E-01  | ***        |                           |               |
| DP10Sum          | -3.56E-01  | 7.44E-02  | ***        |                           |               |
| Clay             | -5.80E-01  | 2.44E-01  | *          |                           |               |
| SE               | 1.22E-02   | 4.37E-03  | **         |                           |               |
| CTI              | 2.44E-01   | 6.91E-02  | ***        |                           |               |
| Shrub            | 1.1467561  | 0.3312632 | ***        |                           |               |
| TxAut            | -0.2690325 | 0.0569823 | ***        |                           |               |
| Alt              | -0.0017543 | 0.0003831 | ***        |                           |               |
| TRan             | 0.0802111  | 0.033057  | *          |                           |               |
| CF               | 1.1775007  | 0.5300833 | *          |                           |               |

## ***Mauremys leprosa***

### **Pairwise correlations, spatial descriptor and FDR**

Human, lithology and land use variables were not correlated, thus all of them were selected in pairwise correlations.

#### **Variables selected**

| <b>Climate</b> | <b>Topography</b> | <b>Spatial</b>   | <b>Variables excluded by the FDR</b> |
|----------------|-------------------|------------------|--------------------------------------|
| DP30Sum        | Alt               | X                | Clay                                 |
| DTn0Spr        | DAlt              | XY               | Grav                                 |
| DTn0Sum        | SE                | X <sup>3</sup>   | U100                                 |
| DTn20          | WE                | Y <sup>2</sup>   |                                      |
| PSpr           | CTI               | Y <sup>3</sup>   |                                      |
| TJul           |                   | X <sup>2</sup> Y |                                      |
| TRan           |                   |                  |                                      |
| AET            |                   |                  |                                      |

### **Final favourability model**

| <b>Variables</b> | <b>β</b>   | <b>SE</b> | <b>Sig</b> | <b>Evaluation metrics</b> |                |
|------------------|------------|-----------|------------|---------------------------|----------------|
| (Intercept)      | -9.14E-01  | 4.15E-01  | *          | AUC                       | 0.8572861      |
| Spatial          | 6.38E-01   | 4.25E-02  | ***        | Kappa                     | 0.5183574      |
| DTn0Spr          | -4.82E-02  | 7.65E-03  | ***        | Sensitivity               | 0.8115038      |
| Sil              | 5.55E-01   | 1.23E-01  | ***        | Specificity               | 0.7743855      |
| U500             | -5.59E-03  | 7.78E-04  | ***        | CCR                       | 0.7844763      |
| DTn0Sum          | -2.75E+00  | 6.57E-01  | ***        | HL                        | 41.2214238 *** |
| Shrub            | 8.07E-01   | 2.27E-01  | ***        |                           |                |
| HPd              | 5.89E-04   | 1.40E-04  | ***        |                           |                |
| CF               | 1.24E+00   | 3.52E-01  | ***        |                           |                |
| PSpr             | 3.26E-03   | 9.92E-04  | ***        |                           |                |
| DP30Sum          | -4.32E-01  | 1.34E-01  | **         |                           |                |
| Past             | -3.68E+00  | 1.77E+00  | *          |                           |                |
| DHi              | 0.0039865  | 0.001976  | *          |                           |                |
| BLF              | 0.8579009  | 0.4324115 | *          |                           |                |
| TRan             | 0.0558105  | 0.022311  | *          |                           |                |
| Gyps             | -0.8969753 | 0.5267162 | ns         |                           |                |
| NIAL             | -0.3628105 | 0.2004525 | ns         |                           |                |

## ***Testudo graeca***

### **Pairwise correlations, spatial descriptor and FDR**

Human, lithology and land use variables were not correlated, thus all of them were selected in pairwise correlations.

#### **Variables selected**

| <b>Climate</b> | <b>Topography</b> | <b>Spatial</b>   | <b>Variables excluded by the FDR</b> |
|----------------|-------------------|------------------|--------------------------------------|
| DP1            | Alt               | Y                | Gyps                                 |
| DP30Spr        | SE                | XY               | CTI                                  |
| DTn0Sum        | WE                | X <sup>2</sup>   | Shrub                                |
| DTn20          | CTI               | Y <sup>2</sup>   | CF                                   |
| DTx25Aut       |                   | Y <sup>3</sup>   | Sil                                  |
| PSum           |                   | X <sup>2</sup> Y | Clay                                 |
| TRan           |                   | XY <sup>2</sup>  | HPd                                  |
| TxWin          |                   |                  | U100                                 |
| AET            |                   |                  |                                      |

### **Final favourability model**

| <b>Variables</b> | <b><math>\beta</math></b> | <b>SE</b> | <b>Sig</b> | <b>Evaluation metrics</b> |               |
|------------------|---------------------------|-----------|------------|---------------------------|---------------|
| (Intercept)      | 5.87E+00                  | 3.57E+00  | ns         | AUC                       | 0.9981490     |
| Spatial          | 1.00E+00                  | 2.15E-01  | ***        | Kappa                     | 0.4687089     |
| BLF              | -1.92E+02                 | 1.14E+02  | ns         | Sensitivity               | 1             |
| WE               | -5.91E-02                 | 2.29E-02  | **         | Specificity               | 0.9844432     |
| NIAL             | -6.81E+00                 | 5.18E+00  | ns         | CCR                       | 0.9845516     |
| DTn20            | -2.80E-02                 | 1.32E-02  | *          | HL                        | 11.5754054 ns |
| SE               | -4.06E-02                 | 1.86E-02  | *          |                           |               |
| DTx25Aut         | 1.14E-01                  | 5.60E-02  | *          |                           |               |

## ***Anguis fragilis***

### **Pairwise correlations, spatial descriptor and FDR**

Human, lithology and land use variables were not correlated, thus all of them were selected in pairwise correlations.

#### **Variables selected**

| <b>Climate</b> | <b>Topography</b> | <b>Spatial</b>   | <b>Variables excluded by the FDR</b> |
|----------------|-------------------|------------------|--------------------------------------|
| DP01           | Alt               | Y                | SE                                   |
| DP30Spr        | SE                | X                | Calc                                 |
| DP30Sum        | WE                | X <sup>2</sup>   | WE                                   |
| DTn0Sum        | CTI               | X <sup>3</sup>   |                                      |
| DTn20          |                   | Y <sup>2</sup>   |                                      |
| TRan           |                   | Y <sup>3</sup>   |                                      |
| TxJul          |                   | X <sup>2</sup> Y |                                      |
| PET            |                   | XY <sup>2</sup>  |                                      |
| AET            |                   |                  |                                      |

### **Final favourability model**

| <b>Variables</b> | <b>B</b>   | <b>SE</b> | <b>Sig</b> | <b>Evaluation metrics</b> |               |
|------------------|------------|-----------|------------|---------------------------|---------------|
| (Intercept)      | 2.67E+00   | 1.11E+00  | *          | AUC                       | 0.9391049     |
| Spatial          | 6.08E-01   | 4.72E-02  | ***        | Kappa                     | 0.6307209     |
| AET              | 4.05E-03   | 6.73E-04  | ***        | Sensitivity               | 0.9068136     |
| DP30Sum          | 5.89E-01   | 1.49E-01  | ***        | Specificity               | 0.8540603     |
| DHi              | -1.54E-02  | 3.18E-03  | ***        | CCR                       | 0.8639789     |
| PET              | -5.92E-03  | 1.30E-03  | ***        | HL                        | 11.6840720 ns |
| U500             | -4.85E-03  | 1.11E-03  | ***        |                           |               |
| HPd              | 3.51E-04   | 1.36E-04  | **         |                           |               |
| BLF              | 1.47E+00   | 3.92E-01  | ***        |                           |               |
| CF               | 1.63E+00   | 4.18E-01  | ***        |                           |               |
| Past             | -1.67E+00  | 6.57E-01  | *          |                           |               |
| TRan             | -6.15E-02  | 2.91E-02  | *          |                           |               |
| DTn20            | 0.0203212  | 0.0081187 | *          |                           |               |
| U100             | -0.0040251 | 0.0024434 | ns         |                           |               |
| DTn0Sum          | 0.2843962  | 0.1636721 | ns         |                           |               |
| Sil              | 0.4647558  | 0.1717781 | **         |                           |               |
| Clay             | 0.4879699  | 0.2540485 | ns         |                           |               |

## ***Podarcis muralis***

### **Pairwise correlations, spatial descriptor and FDR**

Human, lithology and land use variables were not correlated, thus all of them were selected in pairwise correlations.

#### **Variables selected**

| <b>Climate</b> | <b>Topography</b> | <b>Spatial</b>   | <b>Variables excluded by the FDR</b> |
|----------------|-------------------|------------------|--------------------------------------|
| DP01Sum        | Alt               | Y                | U500                                 |
| DP30Sum        | SE                | X                | WE                                   |
| DTn0Sum        | WE                | XY               | DHi                                  |
| DTn20          | CTI               | X <sup>2</sup>   | HPd                                  |
| PSpr           |                   | X <sup>3</sup>   |                                      |
| TRan           |                   | Y <sup>2</sup>   |                                      |
| TxInv          |                   | Y <sup>3</sup>   |                                      |
| AET            |                   | X <sup>2</sup> Y |                                      |
|                |                   | XY <sup>2</sup>  |                                      |

### **Final favourability model**

| <b>Variables</b> | <b>β</b>   | <b>SE</b> | <b>Sig</b> | <b>Evaluation metrics</b> |              |
|------------------|------------|-----------|------------|---------------------------|--------------|
| (Intercept)      | -7.03E+00  | 1.63E+00  | ***        | AUC                       | 0.9790950    |
| Spatial          | 7.69E-01   | 5.21E-02  | ***        | Kappa                     | 0.6890698    |
| DTn20            | -5.60E-02  | 1.77E-02  | **         | Sensitivity               | 0.9391447    |
| CF               | 3.47E+00   | 5.57E-01  | ***        | Specificity               | 0.9191489    |
| U100             | -2.85E-02  | 3.39E-03  | ***        | CCR                       | 0.921439     |
| Alt              | 3.86E-03   | 5.44E-04  | ***        | HL                        | 17.4712761 * |
| BLF              | 2.74E+00   | 5.48E-01  | ***        |                           |              |
| AET              | 5.97E-03   | 1.33E-03  | ***        |                           |              |
| TxWin            | 2.75E-01   | 9.01E-02  | **         |                           |              |
| SE               | -2.64E-02  | 6.88E-03  | ***        |                           |              |
| DP30Sum          | 6.32E-01   | 1.95E-01  | **         |                           |              |
| Sil              | 5.14E-01   | 2.11E-01  | *          |                           |              |
| NIAL             | -1.1542659 | 0.5112433 | *          |                           |              |

## *Elaphe scalaris*

### Pairwise correlations, spatial descriptor and FDR

Human, lithology and land use variables were not correlated, thus all of them were selected in pairwise correlations.

#### Variables selected

| Climate  | Topography | Spatial          | Variables excluded by the FDR |
|----------|------------|------------------|-------------------------------|
| DP30Spr  | Alt        | Y                | WE                            |
| DP30Sum  | SE         | X                | SE                            |
| DTn0Spr  | WE         | XY               | Calc                          |
| DTn0Sum  | CTI        | X <sup>2</sup>   | NIAL                          |
| DTn20    |            | X <sup>3</sup>   | Clay                          |
| DTx25Spr |            | Y <sup>2</sup>   |                               |
| DTx25Sum |            | Y <sup>3</sup>   |                               |
| TRan     |            | X <sup>2</sup> Y |                               |
| ROff     |            | XY <sup>2</sup>  |                               |
| AET      |            |                  |                               |

### Final favourability model

| Variables   | $\beta$    | SE        | Sig | Evaluation metrics |                |
|-------------|------------|-----------|-----|--------------------|----------------|
| (Intercept) | 1.62E+00   | 8.56E-01  | ns  | AUC                | 0.7409146      |
| Spatial     | 6.78E-01   | 6.43E-02  | *** | Kappa              | 0.3028314      |
| DTn0Spr     | -4.97E-02  | 5.73E-03  | *** | Sensitivity        | 0.7317588      |
| DTn20       | -1.16E-02  | 3.16E-03  | *** | Specificity        | 0.5784814      |
| CTI         | -2.74E-01  | 4.37E-02  | *** | CCR                | 0.6469480      |
| HPd         | 5.90E-04   | 1.75E-04  | *** | HL                 | 73.9301215 *** |
| DTx25Sum    | 2.71E-02   | 5.91E-03  | *** |                    |                |
| DTx25Spr    | -5.48E-02  | 7.23E-03  | *** |                    |                |
| U100        | -7.62E-03  | 1.26E-03  | *** |                    |                |
| TRan        | 1.47E-01   | 2.62E-02  | *** |                    |                |
| AET         | 9.25E-04   | 2.74E-04  | *** |                    |                |
| Grav        | 7.58E-01   | 1.88E-01  | *** |                    |                |
| Sil         | 0.3484844  | 0.0993564 | *** |                    |                |
| U500        | -0.0019736 | 0.0006779 | **  |                    |                |
| Past        | -3.0309997 | 1.3219593 | *   |                    |                |
| DTn0Sum     | 0.4530161  | 0.2208598 | *   |                    |                |
| CF          | 0.4398373  | 0.2779301 | ns  |                    |                |

## ***Phalacrocorax aristotelis***

### **Pairwise correlations, spatial descriptor and FDR**

Human, lithology and land use variables were not correlated, thus all of them were selected in pairwise correlations.

#### **Variables selected**

| <b>Climate</b> | <b>Topography</b> | <b>Spatial</b>   | <b>Variables excluded by the FDR</b> |
|----------------|-------------------|------------------|--------------------------------------|
| DP30Sum        | Alt               | Y                | Calc                                 |
| DTn0Win        | DAlt              | X                | WE                                   |
| DTn0Sum        | SE                | XY               | Shrub                                |
| DTn20Aut       | WE                | X <sup>2</sup>   |                                      |
| DTx25Spr       | CTI               | X <sup>3</sup>   |                                      |
| DTx25Sum       |                   | Y <sup>2</sup>   |                                      |
| PAut           |                   | Y <sup>3</sup>   |                                      |
| TRan           |                   | X <sup>2</sup> Y |                                      |
| AET            |                   | XY <sup>2</sup>  |                                      |

### **Final favourability model**

| <b>Variables</b> | <b><math>\beta</math></b> | <b>SE</b> | <b>Sig</b> | <b>Evaluation metrics</b> |               |
|------------------|---------------------------|-----------|------------|---------------------------|---------------|
| (Intercept)      | 2.99E+01                  | 5.54E+00  | ***        | AUC                       | 0.9949604     |
| Spatial          | 5.01E-01                  | 1.15E-01  | ***        | Kappa                     | 0.4715157     |
| DTn0Sum          | -2.57E+01                 | 1.55E+01  | ns         | Sensitivity               | 0.9893617     |
| CTI              | -1.14E+00                 | 2.95E-01  | ***        | Specificity               | 0.9624089     |
| Alt              | -9.30E-03                 | 2.78E-03  | ***        | CCR                       | 0.9628862     |
| SE               | -2.11E-02                 | 1.41E-02  | ns         | HL                        | 13.5115766 ns |
| U100             | 5.73E-02                  | 1.27E-02  | ***        |                           |               |
| MF               | -5.01E+00                 | 1.40E+00  | ***        |                           |               |
| TRan             | -6.81E-01                 | 1.62E-01  | ***        |                           |               |
| BLF              | -5.14E+00                 | 1.43E+00  | ***        |                           |               |
| DHi              | -4.19E-02                 | 1.67E-02  | *          |                           |               |

## ***Ciconia nigra***

### **Pairwise correlations, spatial descriptor and FDR**

Human, lithology and land use variables were not correlated, thus all of them were selected in pairwise correlations.

#### **Variables selected**

| <b>Climate</b> | <b>Topography</b> | <b>Spatial</b>   | <b>Variables excluded by the FDR</b> |
|----------------|-------------------|------------------|--------------------------------------|
| DP10Win        | Alt               | Y                | SE                                   |
| DP30Spr        | DAlt              | X                | CTI                                  |
| DP30Sum        | SE                | XY               |                                      |
| DTn0Spr        | WE                | X <sup>2</sup>   |                                      |
| DTn0Sum        | CTI               | X <sup>3</sup>   |                                      |
| DTn20          |                   | X <sup>2</sup> Y |                                      |
| DTx25Spr       |                   | XY <sup>2</sup>  |                                      |
| TRan           |                   |                  |                                      |
| SIDWin         |                   |                  |                                      |
| SIDSum         |                   |                  |                                      |
| AET            |                   |                  |                                      |

### **Final favourability model**

| <b>Variables</b> | <b>β</b>   | <b>SE</b> | <b>Sig</b> | <b>Evaluation metrics</b> |              |
|------------------|------------|-----------|------------|---------------------------|--------------|
| (Intercept)      | -2.25E+00  | 1.73E+00  | ns         | AUC                       | 0.9619832    |
| Spatial          | 6.52E-01   | 7.58E-02  | ***        | Kappa                     | 0.5469590    |
| AET              | 3.92E-03   | 6.99E-04  | ***        | Sensitivity               | 0.9539749    |
| HPd              | -1.65E-02  | 7.89E-03  | *          | Specificity               | 0.8801242    |
| NIAL             | -2.50E+00  | 5.66E-01  | ***        | CCR                       | 0.8867747    |
| DTn0Sum          | -1.71E+00  | 1.06E+00  | ns         | HL                        | 7.8993221 ns |
| DHi              | 1.71E-02   | 3.29E-03  | ***        |                           |              |
| TRan             | 3.21E-01   | 6.73E-02  | ***        |                           |              |
| Sil              | 7.39E-01   | 2.72E-01  | **         |                           |              |
| DP30Sum          | -2.33E+00  | 6.52E-01  | ***        |                           |              |
| CF               | 2.86E+00   | 7.61E-01  | ***        |                           |              |
| Past             | -3.98E+00  | 2.82E+00  | ns         |                           |              |
| SIDWin           | -3.3990985 | 0.6744347 | ***        |                           |              |
| U500             | -0.0063829 | 0.0017097 | ***        |                           |              |
| DTn0Spr          | -0.0340839 | 0.0221235 | ns         |                           |              |
| BLF              | 1.6387195  | 0.6574473 | *          |                           |              |
| Alt              | -0.0009056 | 0.0005386 | ns         |                           |              |
| Grav             | -0.9810976 | 0.6603876 | ns         |                           |              |



## ***Netta rufina***

### **Pairwise correlations, spatial descriptor and FDR**

Human, lithology and land use variables were not correlated, thus all of them were selected in pairwise correlations.

#### **Variables selected**

| <b>Climate</b> | <b>Topography</b> | <b>Spatial</b>   | <b>Variables excluded by the FDR</b> |
|----------------|-------------------|------------------|--------------------------------------|
| DP30Sum        | Alt               | XY               | Clay                                 |
| DTn0Sum        | DAlt              | X <sup>2</sup>   | NIAL                                 |
| DTn20          | SE                | X <sup>3</sup>   | HPd                                  |
| TRan           | WE                | Y <sup>2</sup>   | TRan                                 |
| SIDSpr         | CTI               | Y <sup>3</sup>   | Gyps                                 |
| AET            |                   | X <sup>2</sup> Y | SE                                   |
|                |                   | XY <sup>2</sup>  | WE                                   |

#### **Final favourability model**

| <b>Variables</b> | <b>β</b>  | <b>SE</b> | <b>Sig</b> | <b>Evaluation metrics</b> |               |
|------------------|-----------|-----------|------------|---------------------------|---------------|
| (Intercept)      | -1.73E+01 | 2.54E+00  | ***        | AUC                       | 0.9130220     |
| CTI              | 5.94E-01  | 1.03E-01  | ***        | Kappa                     | 0.1535811     |
| Spatial          | 4.89E-01  | 9.27E-02  | ***        | Sensitivity               | 0.9113924     |
| SIDSpr           | 1.24E+00  | 5.06E-01  | *          | Specificity               | 0.7768932     |
| MF               | -1.99E+01 | 1.50E+01  | ns         | CCR                       | 0.7808968     |
| Grav             | 7.86E-01  | 3.83E-01  | *          | HL                        | 11.3447743 ns |
| CF               | -3.69E+00 | 1.53E+00  | *          |                           |               |
| BLF              | -4.74E+00 | 2.71E+00  | ns         |                           |               |
| Sil              | -1.18E+00 | 4.70E-01  | *          |                           |               |
| DHi              | 1.33E-02  | 5.48E-03  | *          |                           |               |
| DTn20            | 9.35E-03  | 5.89E-03  | ns         |                           |               |

## ***Gypaetus barbatus***

### **Pairwise correlations, spatial descriptor and FDR**

Human, lithology and land use variables were not correlated, thus all of them were selected in pairwise correlations.

#### **Variables selected**

| <b>Climate</b> | <b>Topography</b> | <b>Spatial</b>  | <b>Variables excluded by the FDR</b> |
|----------------|-------------------|-----------------|--------------------------------------|
| DP10Spr        | Alt               | X               | Sil                                  |
| DP10Sum        | DAlt              | X <sup>3</sup>  | WE                                   |
| DTn0Win        | SE                | Y <sup>2</sup>  | U500                                 |
| DTn0Sum        | WE                | Y <sup>3</sup>  | Gyps                                 |
| DTn20Aut       | CTI               | XY <sup>2</sup> | TRan                                 |
| TRan           |                   |                 |                                      |
| AET            |                   |                 |                                      |

### **Final favourability model**

| <b>Variables</b> | <b>β</b>  | <b>SE</b> | <b>Sig</b> | <b>Evaluation metrics</b> |              |
|------------------|-----------|-----------|------------|---------------------------|--------------|
| (Intercept)      | 4.09E+01  | 1.25E+01  | **         | AUC                       | 0.9952292    |
| Spatial          | 1.20E+00  | 1.87E-01  | ***        | Kappa                     | 0.5098472    |
| DAlt             | 3.65E-03  | 7.99E-04  | ***        | Sensitivity               | 1            |
| U100             | -2.45E-02 | 1.02E-02  | *          | Specificity               | 0.9687680    |
| Shrub            | 5.17E+00  | 1.61E+00  | **         | CCR                       | 0.9692916    |
| CTI              | -2.62E+00 | 7.10E-01  | ***        | HL                        | 9.6854071 ns |
| DP10Sum          | -4.18E-01 | 1.96E-01  | *          |                           |              |
| SE               | 3.98E-02  | 1.95E-02  | *          |                           |              |
| MF               | 4.22E+00  | 1.84E+00  | *          |                           |              |
| CF               | -2.00E+00 | 1.27E+00  | ns         |                           |              |
| DTn0Win          | -3.14E-02 | 1.34E-02  | *          |                           |              |

## ***Neophron percnopterus***

### **Pairwise correlations, spatial descriptor and FDR**

Human, lithology and land use variables were not correlated, thus all of them were selected in pairwise correlations.

#### **Variables selected**

| <b>Climate</b> | <b>Topography</b> | <b>Spatial</b>   | <b>Variables excluded by the FDR</b> |
|----------------|-------------------|------------------|--------------------------------------|
| DP10Sum        | Alt               | XY               | WE                                   |
| DP30Spr        | DAlt              | X <sup>2</sup>   | TRan                                 |
| DTn0Sum        | SE                | X <sup>3</sup>   | U500                                 |
| DTn20          | WE                | Y <sup>2</sup>   | Sil                                  |
| TRan           | CTI               | Y <sup>3</sup>   |                                      |
| TxWin          |                   | X <sup>2</sup> Y |                                      |
| SISWin         |                   | XY <sup>2</sup>  |                                      |
| ROff           |                   |                  |                                      |
| AET            |                   |                  |                                      |

### **Final favourability model**

| <b>Variables</b> | <b>β</b>   | <b>SE</b> | <b>Sig</b> | <b>Evaluation metrics</b> |                |
|------------------|------------|-----------|------------|---------------------------|----------------|
| (Intercept)      | 6.94E+00   | 1.96E+00  | ***        | AUC                       | 0.8543394      |
| Spatial          | 1.16E+00   | 6.99E-02  | ***        | Kappa                     | 0.3870012      |
| Shrub            | 2.45E+00   | 2.76E-01  | ***        | Sensitivity               | 0.7877155      |
| DHi              | 1.54E-02   | 2.11E-03  | ***        | Specificity               | 0.7481735      |
| BLF              | 1.78E+00   | 3.77E-01  | ***        | CCR                       | 0.7550867      |
| DTn20            | 1.25E-02   | 5.42E-03  | *          | HL                        | 72.8182265 *** |
| Calc             | 9.70E-01   | 1.44E-01  | ***        |                           |                |
| U100             | 1.08E-02   | 1.70E-03  | ***        |                           |                |
| MF               | 2.36E+00   | 5.70E-01  | ***        |                           |                |
| SE               | -1.72E-02  | 3.63E-03  | ***        |                           |                |
| DAlt             | 1.30E-03   | 2.43E-04  | ***        |                           |                |
| DP10Sum          | -2.12E-01  | 4.63E-02  | ***        |                           |                |
| Alt              | -0.0021521 | 0.0002819 | ***        |                           |                |
| TxWin            | -0.2564922 | 0.0442536 | ***        |                           |                |
| CTI              | -0.2198655 | 0.095337  | *          |                           |                |
| DP30Spr          | -0.2524642 | 0.0885915 | **         |                           |                |
| NIAL             | -0.679976  | 0.271057  | *          |                           |                |
| Clay             | 0.429391   | 0.1893503 | *          |                           |                |
| AET              | 0.0009067  | 0.0004482 | *          |                           |                |
| Gyps             | 0.6010296  | 0.3554959 | ns         |                           |                |

## ***Aegypus monachus***

### **Pairwise correlations, spatial descriptor and FDR**

Human, lithology and land use variables were not correlated, thus all of them were selected in pairwise correlations.

#### **Variables selected**

| <b>Climate</b> | <b>Topography</b> | <b>Spatial</b>  | <b>Variables excluded by the FDR</b> |
|----------------|-------------------|-----------------|--------------------------------------|
| DP30Spr        | Alt               | X               | DAlt                                 |
| DP30Sum        | DAlt              | XY              | CF                                   |
| DTn0Sum        | SE                | X <sup>2</sup>  | WE                                   |
| DTn20          | WE                | X <sup>3</sup>  | DP30Spr                              |
| DTx25Spr       | CTI               | Y <sup>2</sup>  | Alt                                  |
| TRan           |                   | Y <sup>3</sup>  | SE                                   |
| TnJul          |                   | XY <sup>2</sup> |                                      |
| SIDWin         |                   |                 |                                      |
| SIDSum         |                   |                 |                                      |
| AET            |                   |                 |                                      |

### **Final favourability model**

| <b>Variables</b> | <b>β</b>  | <b>SE</b> | <b>Sig</b> | <b>Evaluation metrics</b> |              |
|------------------|-----------|-----------|------------|---------------------------|--------------|
| (Intercept)      | 6.12E+00  | 4.42E+00  | ns         | AUC                       | 0.9668476    |
| Spatial          | 1.08E+00  | 1.64E-01  | ***        | Kappa                     | 0.2833218    |
| Shrub            | 2.55E+00  | 6.09E-01  | ***        | Sensitivity               | 0.9615385    |
| BLF              | 3.47E+00  | 9.23E-01  | ***        | Specificity               | 0.8765528    |
| DHi              | 2.12E-02  | 4.62E-03  | ***        | CCR                       | 0.8790505    |
| NIAL             | -2.03E+00 | 1.22E+00  | ns         | HL                        | 8.0547909 ns |
| DTx25Spr         | 6.49E-02  | 2.00E-02  | **         |                           |              |
| SIDSum           | -2.95E+00 | 7.08E-01  | ***        |                           |              |
| U100             | -1.18E-02 | 3.82E-03  | **         |                           |              |
| Past             | -1.25E+01 | 6.61E+00  | ns         |                           |              |
| HPd              | -2.20E-02 | 1.88E-02  | ns         |                           |              |
| AET              | 4.00E-03  | 1.20E-03  | ***        |                           |              |
| TRan             | 0.373362  | 0.11373   | **         |                           |              |
| Calc             | -2.011601 | 0.92926   | *          |                           |              |
| Grav             | -2.374854 | 1.579367  | ns         |                           |              |
| DTn20            | -0.017868 | 0.012335  | ns         |                           |              |

## ***Aquila adalberti***

### **Pairwise correlations, spatial descriptor and FDR**

Human, lithology and land use variables were not correlated, thus all of them were selected in pairwise correlations.

#### **Variables selected**

| <b>Climate</b> | <b>Topography</b> | <b>Spatial</b>   | <b>Variables excluded by the FDR</b> |
|----------------|-------------------|------------------|--------------------------------------|
| DP30Spr        | Alt               | Y                | Slop                                 |
| DP30Sum        | Slop              | X                | HPd                                  |
| DTn0Sum        | SE                | XY               | Alt                                  |
| DTn20          | WE                | X <sup>2</sup>   | SE                                   |
| DTx25Spr       |                   | X <sup>3</sup>   | CF                                   |
| TRan           |                   | Y <sup>2</sup>   | U500                                 |
| TnJul          |                   | Y <sup>3</sup>   | WE                                   |
| SIDWin         |                   | X <sup>2</sup> Y |                                      |
| SIDSum         |                   | XY <sup>2</sup>  |                                      |
| AET            |                   |                  |                                      |

### **Final favourability model**

| <b>Variables</b> | <b>β</b>   | <b>SE</b> | <b>Sig</b> | <b>Evaluation metrics</b> |              |
|------------------|------------|-----------|------------|---------------------------|--------------|
| (Intercept)      | 1.48E+01   | 5.08E+00  | **         | AUC                       | 0.9509119    |
| Spatial          | 1.06E+00   | 1.31E-01  | ***        | Kappa                     | 0.235036     |
| NIAL             | -3.66E+00  | 8.89E-01  | ***        | Sensitivity               | 0.9556962    |
| Shrub            | 1.49E+00   | 5.45E-01  | **         | Specificity               | 0.8460194    |
| DP30Spr          | -1.27E+00  | 2.83E-01  | ***        | CCR                       | 0.8492841    |
| BLF              | 3.37E+00   | 9.13E-01  | ***        | HL                        | 1.9422848 ns |
| DHi              | -7.26E-03  | 4.36E-03  | ns         |                           |              |
| AET              | 4.47E-03   | 1.13E-03  | ***        |                           |              |
| Calc             | -1.97E+00  | 6.75E-01  | **         |                           |              |
| Clay             | -1.40E+00  | 5.11E-01  | **         |                           |              |
| TRan             | 2.50E-01   | 8.61E-02  | **         |                           |              |
| SIDSum           | -4.73E+00  | 1.03E+00  | ***        |                           |              |
| SIDWin           | 1.75943    | 1.003337  | ns         |                           |              |
| Past             | -18.897838 | 11.427461 | ns         |                           |              |
| Grav             | 1.205273   | 0.555369  | *          |                           |              |
| DTx25Spr         | 0.041297   | 0.020827  | *          |                           |              |
| DTn20            | -0.030661  | 0.014351  | *          |                           |              |
| TnJul            | 0.154892   | 0.098609  | ns         |                           |              |

## ***Aquila chrysaetos***

### **Pairwise correlations, spatial descriptor and FDR**

Human, lithology and land use variables were not correlated, thus all of them were selected in pairwise correlations.

#### **Variables selected**

| <b>Climate</b> | <b>Topography</b> | <b>Spatial</b>   | <b>Variables excluded by the FDR</b> |
|----------------|-------------------|------------------|--------------------------------------|
| DP01Win        | Alt               | Y                | WE                                   |
| DP30Spr        | DAlt              | X                | Gyps                                 |
| DTn0Sum        | SE                | XY               | U500                                 |
| DTn20Aut       | WE                | X <sup>2</sup>   | MF                                   |
| TSum           | CTI               | X <sup>3</sup>   | SE                                   |
| TRan           |                   | Y <sup>2</sup>   |                                      |
| TnWin          |                   | Y <sup>3</sup>   |                                      |
| AET            |                   | X <sup>2</sup> Y |                                      |
|                |                   | XY <sup>2</sup>  |                                      |

### **Final favourability model**

| <b>Variables</b> | <b>β</b>   | <b>SE</b> | <b>Sig</b> | <b>Evaluation metrics</b> |                |
|------------------|------------|-----------|------------|---------------------------|----------------|
| (Intercept)      | 5.57E+00   | 1.72E+00  | **         | AUC                       | 0.8345716      |
| CTI              | -5.37E-01  | 9.21E-02  | ***        | Kappa                     | 0.4719186      |
| TRan             | 3.63E-01   | 7.22E-02  | ***        | Sensitivity               | 0.7692308      |
| Shrub            | 2.38E+00   | 2.22E-01  | ***        | Specificity               | 0.7506717      |
| Alt              | 6.41E-04   | 2.26E-04  | **         | CCR                       | 0.7562170      |
| DAlt             | 1.55E-03   | 2.10E-04  | ***        | HL                        | 28.4659447 *** |
| Spatial          | 6.38E-01   | 9.12E-02  | ***        |                           |                |
| DP30Spr          | -4.33E-01  | 7.61E-02  | ***        |                           |                |
| DHi              | 6.83E-03   | 1.74E-03  | ***        |                           |                |
| BLF              | 1.99E+00   | 3.38E-01  | ***        |                           |                |
| Past             | -4.39E+00  | 1.22E+00  | ***        |                           |                |
| CF               | 1.27E+00   | 3.03E-01  | ***        |                           |                |
| Clay             | -0.5084866 | 0.1495641 | ***        |                           |                |
| HPd              | -0.0011865 | 0.000636  | ns         |                           |                |
| AET              | -0.0009261 | 0.0003611 | *          |                           |                |
| Grav             | -0.4254798 | 0.2645641 | ns         |                           |                |
| TnWin            | 0.2504006  | 0.0678657 | ***        |                           |                |
| TSum             | -0.1988456 | 0.0703953 | **         |                           |                |
| DTn20Aut         | -0.0401276 | 0.0191527 | *          |                           |                |

## ***Lagopus mutus***

### **Pairwise correlations, spatial descriptor and FDR**

Human, lithology and land use variables were not correlated, thus all of them were selected in pairwise correlations.

#### **Variables selected**

| <b>Climate</b> | <b>Topography</b> | <b>Spatial</b>  | <b>Variables excluded by the FDR</b> |
|----------------|-------------------|-----------------|--------------------------------------|
| DP10Spr        | Alt               | Y               | Past                                 |
| DTn0           | SE                | XY              | Calc                                 |
| DTn0Sum        | WE                | X <sup>2</sup>  | WE                                   |
| DTn20          | CTI               | X <sup>3</sup>  | MF                                   |
| TSum           |                   | Y <sup>3</sup>  |                                      |
| TRan           |                   | XY <sup>2</sup> |                                      |
| AET            |                   |                 |                                      |

### **Final favourability model**

| <b>Variables</b> | <b>β</b>  | <b>SE</b> | <b>Sig</b> | <b>Evaluation metrics</b> |               |
|------------------|-----------|-----------|------------|---------------------------|---------------|
| (Intercept)      | -1.09E+01 | 3.23E+00  | ***        | AUC                       | 0.9994035     |
| Spatial          | 4.61E-01  | 1.81E-01  | *          | Kappa                     | 0.7386766     |
| DTn0             | 5.79E-02  | 1.53E-02  | ***        | Sensitivity               | 1             |
| DP10Spr          | 1.85E-01  | 1.22E-01  | ns         | Specificity               | 0.9918033     |
| Clay             | -1.15E+01 | 6.38E+00  | ns         | CCR                       | 0.9918990     |
| HPd              | -3.77E-01 | 2.80E-01  | ns         | HL                        | 10.9099107 ns |

## ***Tetrao urogallus***

### **Pairwise correlations, spatial descriptor and FDR**

Human, lithology and land use variables were not correlated, thus all of them were selected in pairwise correlations.

#### **Variables selected**

| <b>Climate</b> | <b>Topography</b> | <b>Spatial</b>   | <b>Variables excluded by the FDR</b> |
|----------------|-------------------|------------------|--------------------------------------|
| DP10Spr        | Alt               | Y                | SE                                   |
| DP10Sum        | SE                | X                | Calc                                 |
| DTn0Sum        | WE                | XY               | WE                                   |
| DTn20          | CTI               | X <sup>2</sup>   |                                      |
| Tann           |                   | X <sup>3</sup>   |                                      |
| TRan           |                   | Y <sup>2</sup>   |                                      |
| AET            |                   | X <sup>2</sup> Y |                                      |
|                |                   | XY <sup>2</sup>  |                                      |

### **Final favourability model**

| <b>Variables</b> | <b>β</b>   | <b>SE</b> | <b>Sig</b> | <b>Evaluation metrics</b> |              |
|------------------|------------|-----------|------------|---------------------------|--------------|
| (Intercept)      | 2.57E+01   | 9.73E+00  | **         | AUC                       | 0.9952019    |
| CTI              | -2.21E+00  | 5.55E-01  | ***        | Kappa                     | 0.5690619    |
| Spatial          | 7.09E-01   | 1.25E-01  | ***        | Sensitivity               | 0.9793103    |
| CF               | 1.10E+01   | 1.68E+00  | ***        | Specificity               | 0.9616502    |
| U500             | 2.57E-02   | 4.15E-03  | ***        | CCR                       | 0.9621326    |
| TRan             | 3.29E-01   | 1.20E-01  | **         | HL                        | 8.3280171 ns |
| AET              | -1.29E-02  | 4.41E-03  | **         |                           |              |
| BLF              | 8.13E+00   | 1.45E+00  | ***        |                           |              |
| Sil              | -2.39E+00  | 5.62E-01  | ***        |                           |              |
| MF               | 7.24E+00   | 1.61E+00  | ***        |                           |              |
| Shrub            | 6.44E+00   | 1.45E+00  | ***        |                           |              |
| Alt              | 4.13E-03   | 8.59E-04  | ***        |                           |              |
| DTn0Sum          | -0.9831937 | 0.3410507 | **         |                           |              |
| Past             | 6.9874094  | 3.1664896 | *          |                           |              |
| Grav             | -6.5479217 | 4.8726068 | ns         |                           |              |



## ***Perdix perdix***

### **Pairwise correlations, spatial descriptor and FDR**

Human, lithology and land use variables were not correlated, thus all of them were selected in pairwise correlations.

#### **Variables selected**

| <b>Climate</b> | <b>Topography</b> | <b>Spatial</b>   | <b>Variables excluded by the FDR</b> |
|----------------|-------------------|------------------|--------------------------------------|
| DP10Spr        | Alt               | Y                | SE                                   |
| DP30Sum        | SE                | XY               | WE                                   |
| DTn0Sum        | WE                | X <sup>2</sup>   |                                      |
| DTn20          | CTI               | X <sup>3</sup>   |                                      |
| TSum           |                   | Y <sup>2</sup>   |                                      |
| TRan           |                   | Y <sup>3</sup>   |                                      |
| TxWin          |                   | X <sup>2</sup> Y |                                      |
| SIDSum         |                   | XY <sup>2</sup>  |                                      |
| AET            |                   |                  |                                      |

### **Final favourability model**

| <b>Variables</b> | <b>β</b>  | <b>SE</b> | <b>Sig</b> | <b>Evaluation metrics</b> |               |
|------------------|-----------|-----------|------------|---------------------------|---------------|
| (Intercept)      | 2.92E+01  | 6.72E+00  | ***        | AUC                       | 0.9891759     |
| CTI              | -2.01E+00 | 3.17E-01  | ***        | Kappa                     | 0.5682411     |
| Spatial          | 4.77E-01  | 8.68E-02  | ***        | Sensitivity               | 0.9686099     |
| AET              | -1.13E-02 | 2.56E-03  | ***        | Specificity               | 0.9431662     |
| DTn20            | -1.67E-01 | 7.06E-02  | *          | CCR                       | 0.9442351     |
| BLF              | 5.62E+00  | 9.43E-01  | ***        | HL                        | 10.7791335 ns |
| Shrub            | 5.16E+00  | 9.32E-01  | ***        |                           |               |
| Alt              | 4.36E-03  | 1.01E-03  | ***        |                           |               |
| Past             | 5.13E+00  | 1.68E+00  | **         |                           |               |
| MF               | 3.16E+00  | 1.26E+00  | *          |                           |               |
| CF               | 2.68E+00  | 9.51E-01  | **         |                           |               |
| U100             | -1.42E-02 | 5.70E-03  | *          |                           |               |
| TxWin            | 0.366997  | 0.162182  | *          |                           |               |
| DTn0Sum          | 0.585695  | 0.257855  | *          |                           |               |
| DHi              | 0.016267  | 0.007717  | *          |                           |               |
| DP30Sum          | -0.618032 | 0.255162  | *          |                           |               |

## ***Otis tarda***

### **Pairwise correlations, spatial descriptor and FDR**

Human, lithology and land use variables were not correlated, thus all of them were selected in pairwise correlations.

#### **Variables selected**

| <b>Climate</b> | <b>Topography</b> | <b>Spatial</b>   | <b>Variables excluded by the FDR</b> |
|----------------|-------------------|------------------|--------------------------------------|
| DP30Spr        | Alt               | Y                | U100                                 |
| DP30Sum        | Slop              | X                | Calc                                 |
| DTn0Sum        | SE                | XY               | DHi                                  |
| DTn20Aut       | WE                | X <sup>2</sup>   |                                      |
| TRan           |                   | X <sup>3</sup>   |                                      |
| TxSpr          |                   | X <sup>2</sup> Y |                                      |
| SIDSum         |                   | XY <sup>2</sup>  |                                      |
| SISWin         |                   |                  |                                      |
| ROff           |                   |                  |                                      |
| AET            |                   |                  |                                      |

### **Final favourability model**

| <b>Variables</b> | <b>β</b>  | <b>SE</b> | <b>Sig</b> | <b>Evaluation metrics</b> |              |
|------------------|-----------|-----------|------------|---------------------------|--------------|
| (Intercept)      | -7.15E+00 | 1.74E+00  | ***        | AUC                       | 0.9215608    |
| Slop             | -7.61E-01 | 8.38E-02  | ***        | Kappa                     | 0.3883926    |
| NIAL             | 2.84E+00  | 2.19E-01  | ***        | Sensitivity               | 0.8863636    |
| SIDSum           | 5.07E-01  | 3.01E-01  | ns         | Specificity               | 0.7981172    |
| Spatial          | 4.08E-01  | 8.14E-02  | ***        | CCR                       | 0.8068953    |
| CF               | -5.10E+00 | 1.36E+00  | ***        | HL                        | 5.4435670 ns |
| TRan             | 1.97E-01  | 5.05E-02  | ***        |                           |              |
| HPd              | -1.80E-03 | 7.60E-04  | *          |                           |              |
| Gyps             | -4.07E+00 | 2.26E+00  | ns         |                           |              |
| AET              | -1.80E-03 | 5.90E-04  | **         |                           |              |
| DTn20Aut         | 7.27E-02  | 2.88E-02  | *          |                           |              |
| DTn0Sum          | -2.62E+00 | 1.27E+00  | *          |                           |              |
| U500             | 0.0024771 | 0.0010579 | *          |                           |              |
| WE               | 0.0079399 | 0.0054528 | ns         |                           |              |

## ***Picus viridis***

### **Pairwise correlations, spatial descriptor and FDR**

Human, lithology and land use variables were not correlated, thus all of them were selected in pairwise correlations.

#### **Variables selected**

| <b>Climate</b> | <b>Topography</b> | <b>Spatial</b>   | <b>Variables excluded by the FDR</b> |
|----------------|-------------------|------------------|--------------------------------------|
| DP1Sum         | Alt               | X                | HPd                                  |
| DP30Sum        | DAlt              | XY               | NIAL                                 |
| DTn0Sum        | SE                | X <sup>2</sup>   | Clay                                 |
| DTn20          | WE                | Y <sup>2</sup>   |                                      |
| PSpr           | CTI               | Y <sup>3</sup>   |                                      |
| TAut           |                   | X <sup>2</sup> Y |                                      |
| TRan           |                   | XY <sup>2</sup>  |                                      |
| AET            |                   |                  |                                      |

### **Final favourability model**

| <b>Variables</b> | <b>β</b>   | <b>SE</b> | <b>Sig</b> | <b>Evaluation metrics</b> |               |
|------------------|------------|-----------|------------|---------------------------|---------------|
| (Intercept)      | -7.51E+00  | 1.87E+00  | ***        | AUC                       | 0.8369539     |
| Spatial          | 8.82E-01   | 7.67E-02  | ***        | Kappa                     | 0.4148709     |
| DAlt             | 1.87E-03   | 2.86E-04  | ***        | Sensitivity               | 0.7716463     |
| DTn20            | -3.20E-02  | 4.47E-03  | ***        | Specificity               | 0.7686796     |
| DTn0Sum          | -1.36E+00  | 2.08E-01  | ***        | CCR                       | 0.7711002     |
| BLF              | 3.15E+00   | 5.14E-01  | ***        | HL                        | 24.7656540 ** |
| PSpr             | -2.86E-03  | 9.88E-04  | **         |                           |               |
| MF               | 3.67E+00   | 9.30E-01  | ***        |                           |               |
| CF               | 1.82E+00   | 4.73E-01  | ***        |                           |               |
| DHi              | -8.08E-03  | 2.19E-03  | ***        |                           |               |
| Shrub            | 1.09E+00   | 2.64E-01  | ***        |                           |               |
| Alt              | 1.76E-03   | 3.35E-04  | ***        |                           |               |
| SE               | 0.0097427  | 0.0031684 | **         |                           |               |
| U500             | -0.0014572 | 0.0008354 | ns         |                           |               |
| Gyps             | 2.0835307  | 0.7763705 | **         |                           |               |
| TAut             | 0.1962981  | 0.0604723 | **         |                           |               |
| U100             | -0.0036382 | 0.0015055 | *          |                           |               |
| CTI              | 0.1801179  | 0.0690682 | **         |                           |               |
| Sil              | 0.4071759  | 0.1650496 | *          |                           |               |
| Calc             | 0.3333775  | 0.1835942 | ns         |                           |               |

## ***Pyrrhocorax graculus***

### **Pairwise correlations, spatial descriptor and FDR**

Human, lithology and land use variables were not correlated, thus all of them were selected in pairwise correlations.

#### **Variables selected**

| <b>Climate</b> | <b>Topography</b> | <b>Spatial</b>   | <b>Variables excluded by the FDR</b> |
|----------------|-------------------|------------------|--------------------------------------|
| DTn0Sum        | Alt               | Y                | U500                                 |
| DTn20          | SE                | XY               | SE                                   |
| PSpr           | WE                | X <sup>2</sup>   | Shrub                                |
| TJul           | CTI               | Y <sup>2</sup>   | WE                                   |
| TRan           |                   | Y <sup>3</sup>   |                                      |
| TxWin          |                   | X <sup>2</sup> Y |                                      |
| AET            |                   | XY <sup>2</sup>  |                                      |

#### **Final favourability model**

| <b>Variables</b> | <b>β</b>  | <b>SE</b> | <b>Sig</b> | <b>Evaluation metrics</b> |              |
|------------------|-----------|-----------|------------|---------------------------|--------------|
| (Intercept)      | 3.38E+01  | 4.96E+00  | ***        | AUC                       | 0.9896141    |
| Spatial          | 4.63E-01  | 8.37E-02  | ***        | Kappa                     | 0.5892420    |
| CTI              | -1.88E+00 | 2.70E-01  | ***        | Sensitivity               | 0.9879518    |
| Calc             | 3.42E+00  | 4.01E-01  | ***        | Specificity               | 0.9399091    |
| TJul             | -6.38E-01 | 1.16E-01  | ***        | CCR                       | 0.9421628    |
| DTn0Sum          | 9.52E-01  | 3.32E-01  | **         | HL                        | 9.9494821 ns |
| CF               | -3.10E+00 | 8.84E-01  | ***        |                           |              |
| TRan             | 1.77E-01  | 7.33E-02  | *          |                           |              |
| AET              | 7.33E-03  | 3.54E-03  | *          |                           |              |
| PSpr             | -3.06E-03 | 1.79E-03  | ns         |                           |              |

## ***Pyrrhocorax pyrrhocorax***

### **Pairwise correlations, spatial descriptor and FDR**

Human, lithology and land use variables were not correlated, thus all of them were selected in pairwise correlations.

#### **Variables selected**

| <b>Climate</b> | <b>Topography</b> | <b>Spatial</b>   | <b>Variables excluded by the FDR</b> |
|----------------|-------------------|------------------|--------------------------------------|
| DP01Win        | Alt               | Y                | WE                                   |
| DP10Sum        | DAlt              | XY               | Past                                 |
| DTn0Sum        | SE                | X <sup>2</sup>   | AET                                  |
| DTn20Aut       | WE                | X <sup>3</sup>   | TRan                                 |
| PSpr           | CTI               | Y <sup>2</sup>   | DP01Win                              |
| TAut           |                   | X <sup>2</sup> Y | Clay                                 |
| TRan           |                   | XY <sup>2</sup>  |                                      |
| AET            |                   |                  |                                      |

### **Final favourability model**

| <b>Variables</b> | <b>β</b>   | <b>SE</b> | <b>Sig</b> | <b>Evaluation metrics</b> |                |
|------------------|------------|-----------|------------|---------------------------|----------------|
| (Intercept)      | 1.35E+01   | 1.79E+00  | ***        | AUC                       | 0.8667009      |
| Spatial          | 9.11E-01   | 4.72E-02  | ***        | Kappa                     | 0.5460969      |
| DAlt             | 1.61E-03   | 2.08E-04  | ***        | Sensitivity               | 0.8204986      |
| Shrub            | 1.34E+00   | 2.34E-01  | ***        | Specificity               | 0.7627748      |
| HPd              | -9.40E-04  | 4.01E-04  | *          | CCR                       | 0.7824039      |
| SE               | -1.32E-02  | 2.91E-03  | ***        | HL                        | 26.6660089 *** |
| PSpr             | -3.90E-03  | 7.92E-04  | ***        |                           |                |
| DTn20Aut         | -1.02E-01  | 2.00E-02  | ***        |                           |                |
| CTI              | -6.27E-01  | 9.20E-02  | ***        |                           |                |
| CF               | -1.57E+00  | 3.06E-01  | ***        |                           |                |
| U100             | 6.33E-03   | 1.49E-03  | ***        |                           |                |
| TAut             | -1.23E-01  | 2.29E-02  | ***        |                           |                |
| DP10Sum          | -0.1288606 | 0.0429071 | **         |                           |                |
| DHi              | 0.005302   | 0.0020781 | *          |                           |                |
| U500             | -0.0014488 | 0.0007078 | *          |                           |                |
| Calc             | 0.4651237  | 0.1302131 | ***        |                           |                |
| Grav             | 0.6346786  | 0.2509335 | *          |                           |                |

## ***Galemys pyrenaicus***

### **Pairwise correlations, spatial descriptor and FDR**

Human, lithology and land use variables were not correlated, thus all of them were selected in pairwise correlations.

| <b>Variables selected</b> |                   |                  | <b>Variables excluded by the FDR</b> |
|---------------------------|-------------------|------------------|--------------------------------------|
| <b>Climate</b>            | <b>Topography</b> | <b>Spatial</b>   |                                      |
| DP30Sum                   | Alt               | X                | SE                                   |
| DTn0Sum                   | DAlt              | XY               | WE                                   |
| DTn20                     | SE                | X <sup>2</sup>   |                                      |
| TRan                      | WE                | X <sup>3</sup>   |                                      |
| SIDSpr                    | CTI               | Y <sup>2</sup>   |                                      |
| PET                       |                   | Y <sup>3</sup>   |                                      |
| AET                       |                   | X <sup>2</sup> Y |                                      |

### **Final favourability model**

| <b>Variables</b> | <b>β</b>  | <b>SE</b> | <b>Sig</b> | <b>Evaluation metrics</b> |              |
|------------------|-----------|-----------|------------|---------------------------|--------------|
| (Intercept)      | 2.55E+00  | 3.27E+00  | ns         | AUC                       | 0.9451618    |
| SIDSpr           | -1.18E+00 | 3.93E-01  | **         | Kappa                     | 0.4641254    |
| PET              | -1.51E-02 | 1.97E-03  | ***        | Sensitivity               | 0.9259259    |
| Spatial          | 4.74E-01  | 8.02E-02  | ***        | Specificity               | 0.8375391    |
| DAlt             | 1.93E-03  | 3.01E-04  | ***        | CCR                       | 0.8460814    |
| U100             | -1.73E-02 | 2.88E-03  | ***        | HL                        | 8.0409874 ns |
| Calc             | 2.47E+00  | 1.32E+00  | ns         |                           |              |
| DTn20            | 6.08E-02  | 1.61E-02  | ***        |                           |              |
| NIAL             | -1.42E+00 | 4.84E-01  | **         |                           |              |
| Clay             | 4.07E+00  | 1.32E+00  | **         |                           |              |
| DP30Sum          | -3.26E-01 | 1.50E-01  | *          |                           |              |
| TRan             | 1.07E-01  | 4.91E-02  | *          |                           |              |
| BLF              | 1.1594021 | 0.4496624 | **         |                           |              |
| MF               | 1.5278942 | 0.5935913 | *          |                           |              |
| Shrub            | 0.9421291 | 0.4291355 | *          |                           |              |
| CTI              | 0.2898229 | 0.1644539 | ns         |                           |              |
| DHi              | 0.0058643 | 0.0034182 | ns         |                           |              |
| Sil              | 3.4491757 | 1.3114712 | **         |                           |              |
| Grav             | 3.4589674 | 1.3913402 | *          |                           |              |

## ***Canis lupus***

### **Pairwise correlations, spatial descriptor and FDR**

Human, lithology and land use variables were not correlated, thus all of them were selected in pairwise correlations.

#### **Variables selected**

| <b>Climate</b> | <b>Topography</b> | <b>Spatial</b>   | <b>Variables excluded by the FDR</b> |
|----------------|-------------------|------------------|--------------------------------------|
| DP30Win        | Alt               | Y                | Shrub                                |
| DP30Sum        | SE                | X                | CF                                   |
| DTn0Sum        | WE                | XY               | DHi                                  |
| DTn20          | CTI               | X <sup>2</sup>   | Clay                                 |
| TRan           |                   | X <sup>3</sup>   | WE                                   |
| TnJul          |                   | Y <sup>2</sup>   |                                      |
| SIDWin         |                   | Y <sup>3</sup>   |                                      |
| ROff           |                   | X <sup>2</sup> Y |                                      |
| AET            |                   | XY <sup>2</sup>  |                                      |

### **Final favourability model**

| <b>Variables</b> | <b>B</b>  | <b>SE</b> | <b>Sig</b> | <b>Evaluation metrics</b> |                |
|------------------|-----------|-----------|------------|---------------------------|----------------|
| (Intercept)      | 7.81E-01  | 1.06E+00  | ns         | AUC                       | 0.9549853      |
| Spatial          | 9.86E-01  | 5.03E-02  | ***        | Kappa                     | 0.7057846      |
| TnJul            | -4.44E-01 | 6.54E-02  | ***        | Sensitivity               | 0.9214418      |
| HPd              | -3.51E-03 | 1.06E-03  | ***        | Specificity               | 0.8833412      |
| Past             | -1.91E+00 | 7.94E-01  | *          | CCR                       | 0.8911078      |
| AET              | 1.42E-03  | 6.67E-04  | *          | HL                        | 64.9676153 *** |
| SIDWin           | 1.52E+00  | 4.82E-01  | **         |                           |                |
| ROff             | 5.48E-04  | 2.49E-04  | *          |                           |                |
| DP30Sum          | 2.88E-01  | 1.77E-01  | ns         |                           |                |
| U500             | 1.87E-03  | 1.04E-03  | ns         |                           |                |
| TRan             | 1.37E-01  | 4.17E-02  | **         |                           |                |
| Alt              | -9.77E-04 | 3.45E-04  | **         |                           |                |
| DTn20            | 0.029119  | 0.0096646 | **         |                           |                |
| BLF              | 0.997867  | 0.4280201 | *          |                           |                |
| MF               | 1.1523212 | 0.5657367 | *          |                           |                |

## ***Lutra lutra***

### **Pairwise correlations, spatial descriptor and FDR**

Human, lithology and land use variables were not correlated, thus all of them were selected in pairwise correlations.

| <b>Variables selected</b> |                   |                  | <b>Variables excluded by the FDR</b> |
|---------------------------|-------------------|------------------|--------------------------------------|
| <b>Climate</b>            | <b>Topography</b> | <b>Spatial</b>   |                                      |
| DP1Win                    | Alt               | Y                | SE                                   |
| DP30Spr                   | DAlt              | X                |                                      |
| DP30Sum                   | SE                | XY               |                                      |
| DTn0Sum                   | WE                | X <sup>2</sup>   |                                      |
| DTn20                     | CTI               | Y <sup>2</sup>   |                                      |
| DTx25Spr                  |                   | Y <sup>3</sup>   |                                      |
| TRan                      |                   | X <sup>2</sup> Y |                                      |
| TnSum                     |                   | XY <sup>2</sup>  |                                      |
| SIDWin                    |                   |                  |                                      |
| AET                       |                   |                  |                                      |

### **Final favourability model**

| <b>Variables</b> | <b>β</b>   | <b>SE</b> | <b>Sig</b> | <b>Evaluation metrics</b> |              |
|------------------|------------|-----------|------------|---------------------------|--------------|
| (Intercept)      | -4.69E+00  | 1.50E+00  | **         | AUC                       | 0.8389843    |
| Spatial          | 9.38E-01   | 6.13E-02  | ***        | Kappa                     | 0.5040501    |
| NIAL             | -7.91E-01  | 1.73E-01  | ***        | Sensitivity               | 0.7481600    |
| U500             | 5.55E-03   | 7.58E-04  | ***        | Specificity               | 0.7654604    |
| AET              | 3.43E-03   | 3.94E-04  | ***        | CCR                       | 0.7552751    |
| TRan             | 1.53E-01   | 2.92E-02  | ***        | HL                        | 19.0502509 * |
| CF               | 1.77E+00   | 3.24E-01  | ***        |                           |              |
| Shrub            | 1.29E+00   | 2.45E-01  | ***        |                           |              |
| Grav             | 9.60E-01   | 2.19E-01  | ***        |                           |              |
| DAlt             | 1.43E-03   | 2.07E-04  | ***        |                           |              |
| DP30Spr          | -2.73E-01  | 8.14E-02  | ***        |                           |              |
| Alt              | -1.23E-03  | 2.58E-04  | ***        |                           |              |
| SIDWin           | -1.1192614 | 0.243527  | ***        |                           |              |
| U100             | 0.0054707  | 0.0015113 | ***        |                           |              |
| Clay             | 0.5139878  | 0.1405211 | ***        |                           |              |
| HPd              | -0.0003003 | 0.0001439 | *          |                           |              |
| BLF              | 1.0727376  | 0.3473141 | **         |                           |              |
| DP30Sum          | -0.3856548 | 0.1161857 | ***        |                           |              |
| DHi              | 0.005279   | 0.0019783 | **         |                           |              |
| DP1Win           | -0.0161865 | 0.0106114 | ns         |                           |              |
| CTI              | 0.1195982  | 0.0709648 | ns         |                           |              |
| DTn20            | 0.012441   | 0.0048466 | *          |                           |              |
| TnSum            | -0.0866395 | 0.0424098 | *          |                           |              |
| Gyps             | 0.4284977  | 0.2949751 | ns         |                           |              |



## ***Ursus arctos***

### **Pairwise correlations, spatial descriptor and FDR**

Human, lithology and land use variables were not correlated, thus all of them were selected in pairwise correlations.

#### **Variables selected**

| <b>Climate</b> | <b>Topography</b> | <b>Spatial</b>   | <b>Variables excluded by the FDR</b> |
|----------------|-------------------|------------------|--------------------------------------|
| DP30Spr        | Alt               | Y                | CF                                   |
| DP30Sum        | SE                | X                | SE                                   |
| DTn0Spr        | WE                | XY               | WE                                   |
| DTn0Sum        | CTI               | X <sup>3</sup>   |                                      |
| DTn20          |                   | Y <sup>2</sup>   |                                      |
| TJul           |                   | Y <sup>3</sup>   |                                      |
| TRan           |                   | X <sup>2</sup> Y |                                      |
| SIDSum         |                   | XY <sup>2</sup>  |                                      |
| ROff           |                   |                  |                                      |
| AET            |                   |                  |                                      |

### **Final favourability model**

| <b>Variables</b> | <b>β</b>   | <b>SE</b> | <b>Sig</b> | <b>Evaluation metrics</b> |               |
|------------------|------------|-----------|------------|---------------------------|---------------|
| (Intercept)      | 6.66E+00   | 5.68E+00  | ns         | AUC                       | 0.9909335     |
| Spatial          | 7.20E-01   | 8.85E-02  | ***        | Kappa                     | 0.5785035     |
| HPd              | -5.78E-02  | 3.07E-02  | ns         | Sensitivity               | 0.9805825     |
| U500             | 1.41E-02   | 2.29E-03  | ***        | Specificity               | 0.9482556     |
| DHi              | 3.12E-02   | 6.82E-03  | ***        | CCR                       | 0.9495102     |
| Past             | 6.75E+00   | 1.58E+00  | ***        | HL                        | 10.6984415 ns |
| Clay             | 1.45E+00   | 6.28E-01  | *          |                           |               |
| ROff             | 1.54E-03   | 4.67E-04  | ***        |                           |               |
| DTn0Sum          | -9.84E-01  | 3.25E-01  | **         |                           |               |
| Grav             | 3.26E+00   | 1.29E+00  | *          |                           |               |
| Shrub            | 3.54E+00   | 9.30E-01  | ***        |                           |               |
| DTn0Spr          | 8.02E-02   | 1.60E-02  | ***        |                           |               |
| BLF              | 2.2724366  | 0.9538473 | *          |                           |               |
| MF               | 3.6255715  | 1.2373222 | **         |                           |               |
| NIAL             | 3.6905897  | 1.2625289 | **         |                           |               |
| CTI              | -0.9455483 | 0.3461675 | **         |                           |               |

## ***Felis silvestris***

### **Pairwise correlations, spatial descriptor and FDR**

Human, lithology and land use variables were not correlated, thus all of them were selected in pairwise correlations.

#### **Variables selected**

| <b>Climate</b> | <b>Topography</b> | <b>Spatial</b>   | <b>Variables excluded by the FDR</b> |
|----------------|-------------------|------------------|--------------------------------------|
| DP10Sum        | Alt               | Y                | Sil                                  |
| DTn0Sum        | DAlt              | X                | U100                                 |
| DTn20          | SE                | XY               | MF                                   |
| PSpr           | WE                | X <sup>2</sup>   | TRan                                 |
| TSpr           | CTI               | X <sup>3</sup>   | Gyps                                 |
| TRan           |                   | Y <sup>2</sup>   | U500                                 |
| AET            |                   | Y <sup>3</sup>   |                                      |
|                |                   | X <sup>2</sup> Y |                                      |
|                |                   | XY <sup>2</sup>  |                                      |

### **Final favourability model**

| <b>Variables</b> | <b>β</b>   | <b>SE</b> | <b>Sig</b> | <b>Evaluation metrics</b> |              |
|------------------|------------|-----------|------------|---------------------------|--------------|
| (Intercept)      | -1.19E+00  | 3.54E-01  | ***        | AUC                       | 0.7683479    |
| DAlt             | 1.25E-03   | 1.46E-04  | ***        | Kappa                     | 0.3701999    |
| Spatial          | 1.04E+00   | 7.87E-02  | ***        | Sensitivity               | 0.6823266    |
| Shrub            | 1.42E+00   | 2.04E-01  | ***        | Specificity               | 0.7107955    |
| Alt              | 6.03E-04   | 1.24E-04  | ***        | CCR                       | 0.7012057    |
| BLF              | 2.42E+00   | 3.19E-01  | ***        | HL                        | 8.8091032 ns |
| PSpr             | -3.83E-03  | 8.33E-04  | ***        |                           |              |
| AET              | 2.07E-03   | 3.25E-04  | ***        |                           |              |
| CF               | 7.09E-01   | 2.80E-01  | *          |                           |              |
| Past             | -1.84E+00  | 7.17E-01  | *          |                           |              |
| NIAL             | -4.52E-01  | 1.88E-01  | *          |                           |              |
| DTn20            | -7.30E-03  | 3.31E-03  | *          |                           |              |
| DP10Sum          | -0.0773781 | 0.0327702 | *          |                           |              |
| Calc             | 0.2352353  | 0.1088029 | *          |                           |              |
| Grav             | 0.3993633  | 0.1893693 | *          |                           |              |
| HPd              | -0.0002846 | 0.0001843 | ns         |                           |              |
| WE               | -0.0055291 | 0.0030949 | ns         |                           |              |

## ***Lynx pardinus***

### **Pairwise correlations, spatial descriptor and FDR**

Human, lithology and land use variables were not correlated, thus all of them were selected in pairwise correlations.

#### **Variables selected**

| <b>Climate</b> | <b>Topography</b> | <b>Spatial</b>   | <b>Variables excluded by the FDR</b> |
|----------------|-------------------|------------------|--------------------------------------|
| DP30Spr        | Alt               | Y                | Gyps                                 |
| DP30Sum        | DAlt              | X                | Shrub                                |
| DTn0Spr        | SE                | XY               | Sil                                  |
| DTn0Sum        | WE                | X <sup>2</sup>   | TRan                                 |
| DTn20          | CTI               | X <sup>3</sup>   | Clay                                 |
| DTx25Aut       |                   | Y <sup>2</sup>   | WE                                   |
| TRan           |                   | Y <sup>3</sup>   | MF                                   |
| SISSum         |                   | X <sup>2</sup> Y | BLF                                  |
| ROff           |                   | XY <sup>2</sup>  | AET                                  |
| AET            |                   |                  | HPd                                  |

### **Final favourability model**

| <b>Variables</b> | <b>β</b>  | <b>SE</b> | <b>Sig</b> | <b>Evaluation metrics</b> |              |
|------------------|-----------|-----------|------------|---------------------------|--------------|
| (Intercept)      | -2.55E+02 | 7.29E+01  | ***        | AUC                       | 0.9886930    |
| Spatial          | 3.50E-01  | 2.03E-01  | ns         | Kappa                     | 0.1567660    |
| DTx25Aut         | 2.74E-01  | 7.83E-02  | ***        | Sensitivity               | 0.9655172    |
| CF               | 6.14E+00  | 1.89E+00  | **         | Specificity               | 0.9465808    |
| NIAL             | -5.51E+00 | 2.21E+00  | *          | CCR                       | 0.9466843    |
| SISSum           | 3.12E+01  | 9.45E+00  | ***        | HL                        | 9.6965038 ns |
| DP30Sum          | 1.44E+01  | 3.70E+00  | ***        |                           |              |
| DP30Spr          | -2.28E+00 | 9.13E-01  | *          |                           |              |
| ROff             | 1.02E-02  | 4.43E-03  | *          |                           |              |
| Grav             | -1.84E+00 | 9.69E-01  | ns         |                           |              |

## ***Cervus elaphus***

### **Pairwise correlations, spatial descriptor and FDR**

Human, lithology and land use variables were not correlated, thus all of them were selected in pairwise correlations.

#### **Variables selected**

| <b>Climate</b> | <b>Topography</b> | <b>Spatial</b>   | <b>Variables excluded by the FDR</b> |
|----------------|-------------------|------------------|--------------------------------------|
| DP10Spr        | Alt               | Y                | Gyps                                 |
| DP30Sum        | DAlt              | X                | Calc                                 |
| DTn0Sum        | SE                | XY               | WE                                   |
| DTn20Aut       | WE                | X <sup>2</sup>   | DP30Sum                              |
| TRan           | CTI               | X <sup>3</sup>   | MF                                   |
| TnJan          |                   | Y <sup>2</sup>   |                                      |
| TxJul          |                   | Y <sup>3</sup>   |                                      |
| AET            |                   | X <sup>2</sup> Y |                                      |

### **Final favourability model**

| <b>Variables</b> | <b>β</b>   | <b>SE</b> | <b>Sig</b> | <b>Evaluation metrics</b> |               |
|------------------|------------|-----------|------------|---------------------------|---------------|
| (Intercept)      | -9.88E+00  | 7.68E-01  | ***        | AUC                       | 0.8060400     |
| U100             | 1.17E-02   | 1.43E-03  | ***        | Kappa                     | 0.4235189     |
| Spatial          | 7.20E-01   | 7.44E-02  | ***        | Sensitivity               | 0.7223899     |
| BLF              | 3.40E+00   | 3.14E-01  | ***        | Specificity               | 0.7362366     |
| CF               | 2.87E+00   | 2.93E-01  | ***        | CCR                       | 0.7319141     |
| Shrub            | 1.83E+00   | 2.09E-01  | ***        | HL                        | 10.2530292 ns |
| TxJul            | 1.38E-01   | 2.25E-02  | ***        |                           |               |
| DTn0Sum          | 8.46E-01   | 1.56E-01  | ***        |                           |               |
| DP10Spr          | 9.47E-02   | 2.23E-02  | ***        |                           |               |
| U500             | 3.92E-03   | 7.44E-04  | ***        |                           |               |
| SE               | 8.49E-03   | 2.85E-03  | **         |                           |               |
| DAlt             | 3.00E-04   | 1.41E-04  | *          |                           |               |
| Sil              | -0.2496909 | 0.1045836 | *          |                           |               |
| AET              | 0.0008928  | 0.0003652 | *          |                           |               |
| HPd              | 0.0001989  | 0.0001129 | ns         |                           |               |
| TRan             | 0.0692817  | 0.0337668 | *          |                           |               |
| DTn20Aut         | 0.0304919  | 0.0182856 | ns         |                           |               |

## ***Rupicapra pyrenaica***

### **Pairwise correlations, spatial descriptor and FDR**

Human, lithology and land use variables were not correlated, thus all of them were selected in pairwise correlations.

#### **Variables selected**

| <b>Climate</b> | <b>Topography</b> | <b>Spatial</b>   | <b>Variables excluded by the FDR</b> |
|----------------|-------------------|------------------|--------------------------------------|
| DP10Spr        | Alt               | X                | Shrub                                |
| DP10Sum        | SE                | XY               | Gyps                                 |
| DTn0Sum        | WE                | X <sup>2</sup>   | Calc                                 |
| DTn20          | CTI               | X <sup>3</sup>   | WE                                   |
| Tann           |                   | Y <sup>2</sup>   |                                      |
| TRan           |                   | Y <sup>3</sup>   |                                      |
| AET            |                   | X <sup>2</sup> Y |                                      |
|                |                   | XY <sup>2</sup>  |                                      |

#### **Final favourability model**

| <b>Variables</b> | <b>β</b>  | <b>SE</b> | <b>Sig</b> | <b>Evaluation metrics</b> |              |
|------------------|-----------|-----------|------------|---------------------------|--------------|
| (Intercept)      | 2.86E+01  | 6.22E+00  | ***        | AUC                       | 0.9952173    |
| Spatial          | 4.15E-01  | 8.37E-02  | ***        | Kappa                     | 0.6543732    |
| Alt              | 3.05E-03  | 6.14E-04  | ***        | Sensitivity               | 0.9770642    |
| CTI              | -2.19E+00 | 3.67E-01  | ***        | Specificity               | 0.9603143    |
| U100             | 2.08E-02  | 7.21E-03  | **         | CCR                       | 0.9610023    |
| DHi              | 1.84E-02  | 9.35E-03  | *          | HL                        | 5.3400624 ns |
| DP10Sum          | 2.03E-01  | 1.10E-01  | ns         |                           |              |
| DTn0Sum          | 7.48E-01  | 4.18E-01  | ns         |                           |              |

## **Capra pyrenaica**

### **Pairwise correlations, spatial descriptor and FDR**

Human, lithology and land use variables were not correlated, thus all of them were selected in pairwise correlations.

#### **Variables selected**

| <b>Climate</b> | <b>Topography</b> | <b>Spatial</b>   | <b>Variables excluded by the FDR</b> |
|----------------|-------------------|------------------|--------------------------------------|
| DP01Win        | Alt               | Y                | DTx25Spr                             |
| DP30Spr        | DAlt              | X                | MF                                   |
| DP30Sum        | SE                | XY               | SE                                   |
| DTn0Sum        | WE                | X <sup>2</sup>   | Clay                                 |
| DTn20          | CTI               | X <sup>3</sup>   | AET                                  |
| DTx25Spr       |                   | Y <sup>2</sup>   | DP30Sum                              |
| TRan           |                   | Y <sup>3</sup>   |                                      |
| TnWin          |                   | X <sup>2</sup> Y |                                      |
| SISWin         |                   | XY <sup>2</sup>  |                                      |
| AET            |                   |                  |                                      |

### **Final favourability model**

| <b>Variables</b> | <b>β</b>   | <b>SE</b> | <b>Sig</b> | <b>Evaluation metrics</b> |              |
|------------------|------------|-----------|------------|---------------------------|--------------|
| (Intercept)      | 2.07E+00   | 2.72E+00  | ns         | AUC                       | 0.9376692    |
| Spatial          | 1.22E+00   | 5.74E-02  | ***        | Kappa                     | 0.5036426    |
| CTI              | -4.28E-01  | 1.48E-01  | **         | Sensitivity               | 0.9088099    |
| DP30Spr          | 9.93E-01   | 1.17E-01  | ***        | Specificity               | 0.8341558    |
| DAlt             | 1.87E-03   | 2.91E-04  | ***        | CCR                       | 0.843255     |
| Shrub            | 1.86E+00   | 3.35E-01  | ***        | HL                        | 7.4210190 ns |
| TRan             | 2.57E-01   | 4.02E-02  | ***        |                           |              |
| DHi              | 1.68E-02   | 3.29E-03  | ***        |                           |              |
| CF               | 1.10E+00   | 4.36E-01  | *          |                           |              |
| WE               | -1.24E-02  | 5.09E-03  | *          |                           |              |
| Grav             | 8.07E-01   | 3.73E-01  | *          |                           |              |
| NIAL             | -9.52E-01  | 4.06E-01  | *          |                           |              |
| DTn20            | -0.0086115 | 0.004401  | ns         |                           |              |
| Gyps             | -2.2376372 | 1.5361969 | ns         |                           |              |
| U100             | -0.0037727 | 0.0025533 | ns         |                           |              |
